1 **Transgressive and parental dominant gene expression and cytosine methylation during**  
2 **seed development in *Brassica napus* hybrids**

3

4 **Mauricio Orantes-Bonilla<sup>1†</sup>, Hao Wang<sup>2†</sup>, HueyTyng Lee<sup>1</sup>, Agnieszka A. Golicz<sup>1</sup>, Dandan**  
5 **Hu<sup>2</sup>, Wenwen Li<sup>2</sup>, Jun Zou<sup>2</sup> & Rod J. Snowdon<sup>1\*</sup>**

6

7 <sup>1</sup> Department of Plant Breeding, IFZ Research Centre for Biosystems, Land Use and Nutrition,  
8 Justus Liebig University, Giessen, Germany

9 <sup>2</sup> National Key Laboratory of Crop Genetic Improvement, College of Plant Science &  
10 Technology, Huazhong Agricultural University, Wuhan, People's Republic of China

11

12 **\* Correspondence:**

13 Corresponding author: Rod.Snowdon@agr.uni-giessen.de

14 <sup>†</sup> These authors have contributed equally to this work

15

16 **Keywords:**

17 **Gene expression, methylation, small RNA, seed development, parental dominance**

18 **Abstract:**

19 The enhanced performance of hybrids through heterosis remains a key aspect in plant breeding;  
20 nonetheless, the transcriptomic and epigenomic mechanisms behind it are still not fully  
21 elucidated. In the present study, gene expression, small RNA abundance and genome-wide  
22 methylation patterns were evaluated in hybrids from two distant *Brassica napus* ecotypes  
23 during seed and seedling developmental stages using next generation sequencing technologies.  
24 A total of 71217, 773, 79518 and 31825 differentially expressed genes, microRNAs, small  
25 interfering RNAs and differentially methylated regions were identified respectively.  
26 Approximately 70% of the differential expression and methylation patterns observed could be  
27 explained due to parental dominance levels. Reproductive, developmental, and meiotic gene  
28 copies following transgressive and paternal dominance patterns were found through gene  
29 ontology enrichment and microRNA-target association analyses. Interestingly, maternal  
30 dominance was more prominent in hypermethylated and downregulated features during seed  
31 formation which contrasts strikingly with the general maternal gamete demethylation occurring  
32 during gametogenesis in most plant species. Linkages between methylation and gene  
33 expression allowed the identification of putative genetic epialleles with diverse pivotal  
34 biological functions. Furthermore, most differentially methylated regions, differentially  
35 expressed siRNAs and transposable elements were found near gene flanking regions that had  
36 no differential expression, hence, indicating their potential role in conserving essential genomic  
37 and transcriptomic loci across the parents and offspring.

## 38 Introduction

39

40 Transcriptomic and epigenomic profiling in recent decades have developed higher yielding,  
41 disease resistant and stress tolerant crops (Scossa et al., 2021; Yang et al., 2021) that have not  
42 only expanded the genetic diversity in multiple crop species (Louwaars, 2018) but also  
43 elucidated the role of regulatory and non-coding features in plants (Zanini et al., 2022).  
44 Transcriptomic and epigenomic features have been widely used to determine molecular and  
45 biological functions as well as to differentiate germplasm in plants. For instance, RNA  
46 sequencing (RNA-Seq) data developed through microarrays and next generation sequencing  
47 (NGS) has been used to build gene expression databases for such as Arabidopsis, rice, wheat  
48 and oilseed rape which can in turn be exploited for comparative expression studies (Petryszak  
49 et al., 2016; H. Chen et al., 2022). Small RNAs (sRNAs) derived from endogenous genomic  
50 loci or exogenous sources are known to regulate various functions and responses in plant.  
51 Among them, microRNAs (miRNAs) and small interfering RNAs (siRNAs) have been  
52 classified and characterized into diverse databases, providing thus, a great start for further  
53 transcriptomic research (Griffiths-Jones et al., 2006; Lunardon et al., 2020). Epigenomic  
54 features, those resulting into phenotypical changes without alterations in DNA sequences,  
55 include chromatin interaction, histone modification and DNA methylation (Fitz-James and  
56 Cavalli, 2022). Genome-wide methylation analyses have found methylation level differences  
57 across plant species and determined phenotypic consequences as a result of genomic  
58 methylation (Bartels et al., 2018; Muyle et al., 2022).

59 *Brassica napus* (AACC, 2n=38), an allopolyploid oilseed crop derived from *B.rapa* (AA,  
60 2n=20) and *B.oleracea* (CC, 2n=18), has been no exception to the advancements in the  
61 transcriptomic and epigenomic fields. Differential gene expression in *B.napus* has revealed key  
62 genes in flowering time, disease resistance and abiotic stress (Wu et al., 2016; P. Wang et al.,  
63 2017; Jian et al., 2019). Small RNAs profiling has also identified microRNA and siRNA  
64 sequences associated with pathogen response, abiotic stress and lipid metabolism in oilseed  
65 rape (Z. Wang et al., 2017; Jian et al., 2018; Martinez Palacios et al., 2019; Regmi et al., 2021).  
66 Genome-wide DNA methylation research has likewise detected methylated regions and  
67 patterns that contribute to heat response, DNA repair and fertility in *B.napus* (Li et al., 2016;  
68 Ran et al., 2016; Wang et al., 2018; Yin et al., 2021).

69 Recent studies have integrated multiple omics strategies to obtain a detailed scenario of  
70 expression and methylation patterns in oilseed rape (Shen et al., 2017; Wang et al., 2018).  
71 Interestingly, Shen et al. (2017) found specific expression and methylation patterns in a major  
72 commercial *B. napus* hybrid that were linked to heterosis, a hybrid specific effect of high  
73 interest for crop improvement. The enhanced performance observed due to heterosis has been  
74 mostly evaluated at the genomic level and explained through allele interactions (Fujimoto et  
75 al., 2018) and introgressions of genomic regions between genetically and genomically distant  
76 parents (D. Hu et al., 2021; Quezada-Martinez et al., 2021). Nevertheless, the transcriptomic  
77 and epigenomic networks involved in heterosis have not been fully elucidated; hence limiting  
78 the potential of regulatory and non-coding features in plant breeding.

79 RNA-Seq and methylation-based studies have dissected putative heterotic loci in embryo and  
80 seed developmental stages in hybrid plants (Meyer et al., 2012; Kawanabe et al., 2016; Alonso-  
81 Peral et al., 2017; L. Chen et al., 2022). Early heterosis through increase of cell size and number,  
82 seed yield and biomass has been reported in *A. thaliana* and maize (Jahnke et al., 2010; L. Wang

83 et al., 2017; Zhu et al., 2020; Groszmann et al., 2014). The latter authors found that the maternal  
84 genotype was the major determinant of heterosis at early developmental stages in *A. thaliana*.  
85 Seed development is also well characterized for enriched epigenomic mechanisms through  
86 methylation and transcriptomic regulation with pollen cells being hypermethylated and ovule  
87 cells demethylated in most plants (Batista and Köhler, 2020; Montgomery and Berger, 2021).  
88 Such parental dominances are attributed to have a main role during seed formation through  
89 diverging gamete methylation patterns (Weigel and Colot, 2012; Lauss et al., 2018). Moreover,  
90 the merging of parental genomes during embryogenesis leads to a genomic shock that can  
91 further alter the hybrid transcriptome (Bird et al., 2018).

92 Furthermore, diverse studies in parent-offspring trios have compared parental dominant and  
93 transgressive gene expression patterns via expression level dominance (ELD) analyses in  
94 polyploids including *B. napus* (Yoo et al., 2013; Wu et al., 2018; Li et al., 2020). To the best of  
95 our knowledge, no previous study has evaluated dominance level patterns in expression and  
96 methylation in *B.napus* hybrids directly derived from two *B.napus* parents. Therefore, the  
97 present study analyses transcriptomic and epigenomic differences during seed and seedling  
98 development in winter ecotype *B.napus* Express 617 (Lee et al., 2020) and semi-winter ecotype  
99 *B.napus* G3D001 (Zou et al., 2018) and their respective hybrid. For this purpose, mRNA, small  
100 RNA and whole-genome bisulfite sequencing were carried in all aforementioned genotypes.  
101 Differential features were identified and classified by their respective expression or methylation  
102 dominance levels to detect parental and hybrid-specific patterns associated with early  
103 developmental stages. Gene ontology enrichment and integration of omics features were  
104 performed to find putative interactions between found features and consequently evaluate their  
105 epigenomic and transcriptomic impact in early heterosis.

106

## 107 **Material and Methods**

108

### 109 **Experimental design and growing conditions**

110 Seeds from winter-type oilseed rape Express 617 (maternal line), semi-winter semi-synthetic  
111 oilseed rape G3D001 (paternal line) and their F1 offspring were planted at the same time at  
112 Huazhong Agricultural University of Wuhan field station. The third youngest leaf from each  
113 genotype were sampled from seedlings having six unfolded leaves (BBCH16) at 10 AM under  
114 liquid nitrogen. Flower buds with similar sizes were selected on the fifth day after reaching full  
115 flowering (BBCH65) to perform selfing in all genotypes and crosses between Express 617  
116 (female recipient) and G3D001 (male donor). The newly generated F1 crosses were employed  
117 to analyze the transcriptomic and epigenomic differences during seed formation between ovules  
118 pollinated from selfed-F1 plants and those pollinated from outcrossing from Express 617 and  
119 G3D001 which from here onwards are referred as F0. Pollinated ovules were taken out with  
120 tweezers 15 and 30 days after pollination (DAP) at 10 AM and quickly placed in sampling tubes  
121 under liquid nitrogen. Biological replicates consisted of pooled-sampling from the third  
122 youngest leaf from seven individual plants for leaf samples, and from four pollinated ovules  
123 from four different plants. The sampled tissue was aliquoted and used for all sequencing types  
124 described in this study. Moreover, three biological replicates were used for messenger and small  
125 RNA expression experiments. Two biological replicates were used for methylation studies  
126 instead, due to low material availability for some samples.

127

## 128 mRNA, small RNA and whole genome bisulfite sequencing

129 mRNA was extracted using TRIzol™ Reagent (Thermo Fisher). A total of 0.5 µg of total RNA  
130 per biological replicate were used for preparing 150 bp paired-end (PE) read libraries using the  
131 NEBNext® Ultra™ II RNA Library Prep Kit (New England Biolabs, Inc.). Small RNA was  
132 extracted using a Plant miRNA kit (Omega Bio-tek Inc.). One microgram of total RNA per  
133 biological replicate was employed for the construction of 50 bp single-end (SE) reads using  
134 NEBNext® Multiplex Small RNA Library Prep Set for Illumina™ (New England Biolabs, Inc.).  
135 Lastly, 2.5 µg of CTAB extracted-DNA per biological replicate were first treated with sodium-  
136 bisulfite using the Zymo EZ DNA Methylation-Lightning™ Kit (Zymo Research Corp.) and  
137 then built into 150 bp PE read libraries with the TruSeq Nano DNA LT Sample Prep Kit  
138 (Illumina Inc.). All libraries were sequenced using an Illumina NovaSeq 6000 platform  
139 (Illumina Inc.). Read quality was evaluated with FastQC v.0.11.9 (Andrew S., 2010) and  
140 multiqc v.1.9 (Ewels et al., 2016) for all sequencing types.

## 141 mRNA and sRNA alignments

142 mRNA libraries were first filtered by selecting reads with an exact 150 bp length, minimum  
143 base quality phred value of 5, no unqualified bases and less than 15% N bases using fastp  
144 v.0.23.1 *-q 5 -u 0 -n 15 -l 150* settings (Chen et al., 2018). Splice sites in the Express 617  
145 reference (Lee et al., 2020) were identified by first converting its gene annotation file format  
146 (Express617\_v1\_gene.gff3; MD5: cf26ec54823f348a0e23f027dc386a16) from a general  
147 feature format v.3 (GFF3) to a general transfer format (GTF) using the  
148 *agat\_convert\_sp\_gff2gtf.pl* script from AGAT v.0.5.0 (Dainat J., 2019). The output was then  
149 employed to find splice sites with the *hisat2\_extract\_splice\_sites.py* script from HISAT2 (Kim  
150 et al., 2019). An index from the same Express 617 reference was built with *hisat2-build*  
151 function, and libraries were then aligned with HISAT2 using the *sensitive* preset and the *known-*  
152 *splicesite-infile* setting with the *hisat2\_extract\_splice\_sites.py* previously generated file as  
153 input. Alignments were sorted and converted to a binary alignment map (BAM) format with  
154 samtools (Li et al., 2009) *view* and *sort* functions. The number of fragments in genes were  
155 counted with featureCounts 2.0.1 (Liao et al., 2014) using the AGAT GTF annotation file and  
156 the following settings *-p -B -C -Q 50 -t "exon" -g "gene\_id"*, so that only read pairs having a  
157 minimum mapping quality of 50 and had both reads aligned to the same strand and chromosome  
158 were counted. Genes without any counts in all genotypes were removed. Small RNA libraries  
159 were first filtered by removing reads shorter than 18 bp with seqtk v.1.3 (Li H., 2016). Then  
160 sRNA libraries were aligned against the Express 617 reference (Lee et al., 2020) using  
161 ShortStack v.3.8.5 (Johnson et al., 2016). Only sRNA in which at least 80% of the primary  
162 reads had a length between 20-24 nucleotides, with less than 5 unpaired bases in secondary  
163 structure, and which were contained in predicted hairpin structures (i.e., only small RNAs  
164 clusters with *Y*, *NI5*, *NI4* or *NI3* flags.) were considered as miRNA candidates. Small RNA  
165 sequences in which in which 80% of the primary reads had an exact length of 24 nucleotides  
166 and without miRNAs selection flags were regarded as putative siRNAs. Both miRNAs and  
167 siRNAs clusters without any coverage in all biological samples were discarded prior differential  
168 expression analysis.

## 169 Expression level dominance analysis

170 The gene and sRNA differential expression patterns between the hybrid and parents were  
171 assessed by comparing tissues within genotype trios in the five following stages: leaves at the  
172 six-true opened leaves stage from parents and F1 (BBCH16); 15 days after pollination ovules  
173 from selfed parents and F1 (OS15-F1) or F0 (OS15-F0); and from 30 days after pollination  
174 ovules from selfed parents and F1 (OS30-F1) or F0 (OS30-F0). Differentially expressed genes  
175 (DEGs), differentially expressed miRNAs (DE-miRNAs) and differentially expressed siRNAs



176 (DE-siRNAs) between genotypes for each stage were identified using DESEQ2 (Love et al.,  
177 2014) with a padj value threshold  $< 0.05$ . The DESEQ2 built-in *estimateSizeFactors* and *counts*  
178 functions were used to extract the normalized counts which were then used for expression level  
179 dominance analyses. Briefly, student's t-test ( $p < 0.05$ ) from normalized counts of DEGs and  
180 DE-miRNAs identified in DESEQ2 were run between all genotypes for each comparison stage  
181 and gene. Tukey tests ( $p < 0.05$ ) were then carried to rank each genotype by expression level.  
182 Finally, the resulting patterns were divided based on Yoo et al. (2013) as additive, dominant or  
183 transgressive. Gene expression heatmaps were generated with idep93 (Ge et al., 2018) using  
184 correlation distances and average linkages, and differentially expressed genes or sRNA shared  
185 between all stages were detected using the *Venn Diagrams* tool (VIB-UGent, 2021). In addition,  
186 the percentages of upregulated and downregulated DEGs from all genes per subgenome,  
187 genotype and stage were calculated to evaluate subgenomic expression bias.

### 188 **Gene ontology enrichment**

189 Gene models in the Express 617 reference assembly (Lee et al., 2020) were functionally  
190 annotated through synteny comparison against the Darmor v.4.1 (Chalhoub et al., 2014) with  
191 inparanoid v.4.2 (O'Brien et al., 2005) using bootstrap, a BLOSUM80 (BLOcks SUBstitution  
192 Matrix) and an initial cut-off score of 60. Inparalogs with a similarity score equal or greater  
193 than 70 were selected for each gene. Pairs with only one homolog and with the highest similarity  
194 score were kept. The homologs were used for gene ontology enrichment of biological processes  
195 based on expression level dominance for each stage, as well in comparisons between the F1 and  
196 F0 genotypes, using ShinyGo v.0.76 (Ge et al., 2020) with a 0.05 false discovery rate (FDR)  
197 cutoff. Only biological functions with more than one gene per biological pathway and with at  
198 least two GO groups were selected.

### 199 **DE-miRNA target prediction and mRNA interaction**

200 Differentially expressed miRNAs sequences were extracted and used to predict their  
201 corresponding targets in Express 617 gene models using psRNATarget (Dai et al., 2018) with  
202 the version 2 scoring schema (Axtell, 2013). Maximum unpaired energy (UPE) of 25 and a  
203 flank length between 13 to 17 nucleotides in up/downstream region were set as target  
204 accessibility cutoffs. All possible targets for DE-miRNAs were reported since each miRNA can  
205 have multiple mRNA targets due to isomiRs formation. The DE-miRNAs were classified into  
206 putative miRNA families by blasting their sequences with BLAST (Altschul et al., 1990)  
207 against the mature miRNAs from the Brassicaceae family available at the miRBase sequence  
208 database release version 22.1 (Griffiths-Jones et al., 2006). Only the top five matches with the  
209 highest alignment scores and lowest expect values for each DE-miRNA were kept. Stem-loop  
210 sequences from the Brassicaceae family were used as BLAST targets when no mature miRNAs  
211 matches were found. Alternatively, if no Brassicaceae matches were found, then mature  
212 miRNAs and stem-loop sequences from the Viridiplantae clade were employed. The expression  
213 patterns from miRNA targets that were DEGs were compared with their associated targeting  
214 DE-miRNA expression to evaluate possible interactions between miRNA and mRNA target.  
215 The DEGs target functions were estimated by blasting their coding sequences against the  
216 Araport v.11 *Arabidopsis thaliana* coding sequences model (Cheng et al., 2017) with BLAST.  
217 Only the hit with the lowest expect value and not greater than  $1.0 \times 10^{-4}$ , lowest identity  
218 percentage equal or above 90% and without any opened gaps were selected.

### 219 **Bisulfite sequencing alignment and methylation level dominance**

220 Reads with a minimum base quality phred value of 5, unqualified base percent limit of 50 and  
221 less than 15% N bases were selected from WGBS libraries using fastp v.0.23.1 *-q 5 -u 50 -n 15*  
222 settings (Chen et al., 2018). TrimGalore (Krueger et al., 2021) was then employed for trimming

223 8 basepairs from both 5' and 3' ends for each library as recommended for TruSeq libraries in  
224 the Bismark documentation. The Express 617 reference genome (Lee et al., 2020) was bisulfite  
225 converted and indexed with Bismark v.0.23 (Krueger and Andrews, 2011)  
226 *bismark\_genome\_preparation* tool. Filtered reads were aligned to the bisulfite converted  
227 genome using *bismark* under default settings. Duplicates were afterwards removed with  
228 *deduplicate\_bismark* and methylated cytosines (mC's) were extracted using  
229 *bismark\_methylation\_extractor* while ignoring the first 2 basepairs from both 5' and 3' ends for  
230 both reads of a pair. Methylated C's in either the CpG, CHG or CHH methylation context were  
231 selected and converted to a browser extensible data (BED) format with *bismark2bedGraph*  
232 using the *--cutoff 3 --CX* and *--scaffolds* settings to select all nucleotides in which the  
233 methylation state was reported at least thrice.

234 The coverage for each mC's in every methylation context was calculated with the  
235 *coverage2cytosine* from the Bismark package. The coverage of mC's in assigned chromosomes  
236 was then used as input for DMRCaller v. 1.22.0 (Catoni et al., 2018) to detect differentially  
237 methylated regions (DMRs). Each genotype within a trio was compared to each other using the  
238 *computeDMRs* function in 1000 bp bins with the *bins* method and the following settings: score  
239 test, a 0.01 p value threshold, and minimum cytosine count, methylation proportion difference  
240 and gap between bins of 4, 0.4 and 0 accordingly. The DMRs methylation levels (i.e. the  
241 number of reads supporting methylation) were extracted from DMR output files and student's  
242 t-test ( $p < 0.05$ ) were run between all genotypes for each stage and DMR. Tukey tests ( $p < 0.05$ )  
243 were then used to rank the methylation within DMRs between genotypes and classified them  
244 by methylation level dominance following the same categorization employed for ELD by Yoo  
245 et al. (2013). Shared and unique DMR across all stages were found with the *Venn Diagrams*  
246 tools (VIB-UGent, 2021).

#### 247 **Cytosine methylation statistics and identification of methylated features**

248 The number of methylated cytosines and the cytosine methylation level per 1 kbp bin (i.e.  
249 numbers of reads supporting cytosine methylation per bin) in each methylation context,  
250 genotype and stage were determined based on Bismark's *coverage2cytosine* generated files  
251 using bedtools *makewindows* and *intersect* functions (Quinlan and Hall, 2010). In addition,  
252 DMRs were intersected with exons, introns, repeats and 1 kbp upstream promoter regions from  
253 Express 617 using bedtools *intersect* function. GO enrichment was carried for differentially  
254 expressed genes having DMRs for all stages and genotypes. If no enrichment was detected,  
255 then the most frequent biological functions found in Ensembl Biomart (Cunningham et al.,  
256 2022) *B. napus* reference (Chalhoub et al., 2014) were reported. Detected differentially  
257 expressed genes having an additive or dominant expression level dominance pattern which loci  
258 coincided with correspondingly additively or dominantly methylated DMRs were defined as  
259 putative genetic epialleles.

260 Heatmaps comparing the gene methylation and expression in transgressive DEGs were made  
261 with Heatmapper (Babicki et al., 2016) using Euclidean distances and average linkages to  
262 analyze the interaction between expression and methylation. Moreover, repeats in the Express  
263 617 assembly were assigned to repeat families using RepeatModeler (Smit, A. F. A. and  
264 Hubley, R., 2008) and CpG islands were identified with *cpgplot* from the EMBOSS v.6.6.0  
265 package (Rice et al., 2000). CpG islands were called if the GC% was equal or greater than 50%,  
266 length greater than 200 bp and a minimum 0.6 observed to expected CpG dinucleotides ratio as  
267 described by Gardiner-Garden and Frommer (1987). Additionally, plots showing DEGs and  
268 methylation levels for each chromosome and stage, centromere loci and repeat density were  
269 made using the *circlize* package (Gu et al., 2014). Repeat density for each 1 kbp bin within each  
270 chromosome was calculated using bedtools while predicted Express 617 centromere loci were  
271 added based on Orantes-Bonilla et al. (2022).

272 Lastly, DMRs were intersected with DE-siRNAs, CpG islands and transposable elements (TEs)  
273 in 5 kbp upstream and downstream gene and DEG flanking regions in assigned chromosomes  
274 using bedtools to evaluate putative interactions between differentially methylated features and  
275 gene expression during seed development. The threshold was selected based on previous work  
276 on transposable elements and genomic imprinting in *B.napus* by Rong et al. (2021) and the fact  
277 that the average distance between genes in assigned chromosomes of the Express 617 reference  
278 is approximately 7.5 kbp. Chi-square tests followed with an FDR post-hoc adjustment ( $p <$   
279  $0.05$ ) were carried to find significant associations between differentially methylated and non-  
280 methylated features and distance to genes or DEGs across all stages.

## 281 Segmental expression assessment

282 Clustering of DEGs across chromosomal segments observed on *circIize* generated plots were  
283 further investigated. In order to assess the presence of expression clusters, segments that had  
284 more than 20 DEGs over a 500 kbp window were considered as putative differentially expressed  
285 segments. The threshold was selected on the basis that the Express 617 assembly has an average  
286 of 200 genes per 500 kbp and hence 20 genes would correspond to 10% of genes in the segment.  
287 The ratio of upregulated to downregulated DEGs per genotype and stage in each segment was  
288 calculated and normalized to Z-scores. Only segments showing clear differential patterns  
289 between genotypes based on Z-score heatmap clustering were kept. Such segments could either  
290 be a result of parental expression bias or due to commonly observed genomic rearrangements  
291 in allopolyploid *B. napus*. To investigate both possibilities, available short read genomic data  
292 from a G3D001 biological replicate was used for calling Copy Number Variation (CNV) and  
293 investigating putative linkages between structural rearrangements and expression patterns. For  
294 this purpose, genomic DNA from a G3D001 ovule biological replicate taken 30 days after  
295 pollination was extracted using a CTAB protocol (Doyle and Doyle, 1987). Paired-end libraries  
296 were built with KAPA HyperPlus Kit (KAPA Biosystems) and sequenced with an Illumina  
297 NovaSeq 6000 platform (Illumina Inc.). Reads quality was evaluated with FastQC v.0.11.9 and  
298 libraries were afterwards aligned with minimap2 (Li, 2018) against the Express 617 genomic  
299 reference (Lee et al., 2020). Alignments with both forward and reverse reads properly mapped  
300 (flags 99,163,147 and 83) were selected with samtools *view* and used to calculate coverage  
301 across chromosomes using the *bamtobed* and *genomecov* functions from bedtools. The  
302 coverage was used as input in a modified deletion-duplication pipeline previously described  
303 (Stein et al., 2017) with the exception that outliers were removed if the depth was above 100  
304 and that deletions and duplications were defined as 25 kbp length segments that are one standard  
305 deviation above or below the mean coverage. Deletion and duplication were saved in tab-  
306 separated files and intersected with differentially expressed segments using bedtools *intersect*  
307 function.

308

## 309 Results

310

### 311 Increased maternal dominant expression and methylation during seed development

312 Expression and methylation patterns from Express 617, G3D001 and their F1 were compared  
313 during seed and seedling developmental stages. The parents were crossed during the experiment  
314 to evaluate developmental differences between selfed-F1 plants and Express 617 x G3D001  
315 pollinated ovules that will develop into F1 plants, which from here onwards are referred as F0  
316 as displayed in Fig. 1. Next generation sequencing yielded abundant coverage for each

317 biological replicate as reported in Tables S1-S3. Approximately 6.8 Gbp of mRNA sequences  
318 per biological replicate were aligned against the Express 617 assembly (Lee et al., 2020) using  
319 HISAT2 v. 2.2.1 splice site aware aligner (Kim et al., 2019) consequently producing mean  
320 alignment rates of 98.2% (Table S1). In addition, an average of 31 million sRNA reads per  
321 biological replicate were used to find putative miRNA and siRNA sequences with ShortStack  
322 v.3.8.5 (Johnson et al., 2016). Overall, each sRNA cluster had an average coverage depth of  
323 186 (Table S2). Moreover, whole-genome bisulfite treated reads having a 31x genome coverage  
324 per biological replicate were aligned and processed with Bismark v.0.23 (Krueger and  
325 Andrews, 2011) as reported on Table S3.

326 All alignments were then employed to find features that were differentially expressed or  
327 differentially methylated between genotypes across all stages. In summary, a total of 71217  
328 DEGs, 773 DE-miRNAs, 79518 DE-siRNAs and 31825 DMRs in both CpG and CHG  
329 methylation contexts were identified across all possible parents and hybrid comparisons per  
330 stage (Tables S4-S8) which were overall evenly distributed across all chromosomes (Tables  
331 S9-S13). Differential features were further classified by their expression level dominance and  
332 methylation level dominance (MLD) as specified in Materials and Methods and reported in  
333 Figure 2. More than 90% of the differentially expressed and methylated features belong to the  
334 parental dominant and additivity models. Moreover, maternal dominance accounted for  
335 approximately 89%, 85%, 83% and 60% from all detected DEGs, DE-miRNAs, DE-siRNAs  
336 and DMRs in the F0 respectively, whereas in the F1-selfed offspring the paternal dominance  
337 was more prevalent (Table S14). Furthermore, most maternal dominant DMRs in the F0 were  
338 hypermethylated, whereas DEGs were downregulated which is contrasting to the expected  
339 female gamete demethylation observed in seed formation in other plants (Batista and Köhler,  
340 2020).

341 Transgressive upregulated features, in which the hybrid has a higher expression than the  
342 parents, were more frequent in seeds from selfed-F1 plants compared to those from the recently  
343 formed F0. Maternal dominance from Express 617 accounts for most of the DEG and DE-  
344 siRNAs patterns observed, hence indicating the maternal relevance in seed development.  
345 Interestingly no gene expression bias was found between the A and C subgenomes (Table S15,  
346 Figure S1-S5); nevertheless, more upregulation was observed in the paternal line while the  
347 maternal one displayed more downregulation during seed development. This contrasts with the  
348 expected gene silencing in the maternal genome that can be attributed to maternal  
349 demethylation during seed formation. Moreover, a slightly higher number of differentially  
350 expressed features following maternal expression patterns were found in the F0 than in the  
351 selfed-F1; however, this might be due to the allele segregation in the selfed-F1 plants that would  
352 lead to the maternal parent being heterozygote and putatively reducing the number of features  
353 with maternal dominant expression.

354 The number of detected DEGs, DE-miRNAs, DE-siRNAs and DMRs in CpG and CHG  
355 contexts shared between all stages were 1565, 12, 1111, 896 and 650 accordingly (Tables S16).  
356 Altogether, differential features shared across all stages and genotypes corresponded to 3%  
357 from all found features, whereas features unique to each stage compromised approximately 2%  
358 (Table S16). Moreover, differential features that had the same dominance level patterns across  
359 sampling stages are presented in Fig. 3. Interestingly, features that had more constant  
360 dominance patterns in a higher number of stages were in the maternal dominance group. These  
361 features were mostly shared between early and late pollinated ovule stages in the F1 and F0  
362 (Table S17-S20), indicating the relevance of the maternal genotype during seed formation for  
363 both genotypes.

364



## 365 **DEGs and miRNAs regulate seed development**

366 Gene ontology (GO) enrichment for biological processes was carried for all stages based on  
367 their expression level dominance. Significant enrichment for pivotal biological functions such  
368 as amino acid and carbohydrate synthesis, photosynthesis, protein transport and DNA repair  
369 and replication were found in 15 and 30 days after pollination ovules (Table S21). No  
370 significant enrichment was identified in leaves during the seedling stage. Interestingly, only  
371 transgressively upregulated genes in F1 ovules after 15 days of pollination displayed terms  
372 associated with reproduction and meiosis as shown in Figure 4, Table S22 and Figures S6-S10.  
373 Differential gene expression and gene ontology between the F1 and F0 15 days after pollination  
374 showed that the F1 engages more in photosynthesis-related functions, whereas the F0 has an  
375 increased accumulation of energy reserve compounds and cell mobilization (Table S21).

376 Additionally, 51 putative mRNA targets from all DE-miRNAs were detected across all stages  
377 (Table S23). Interactions between DE-miRNAs and their mRNA targets were analyzed for  
378 targets which were DEGs as reported in Table 1 and Table S24. Most DE-miRNAs associated  
379 with DEG targets had downregulated expression in the parents and F1 (ELD IX) and were more  
380 abundant during the late seed developmental stage. Expression from ortholog copies from  
381 *PHABULOSA*, *REVOLUTA* and *TOE2* (*TARGET OF EARLY ACTIVATION TAGGED 2*),  
382 which are involved in plant growth and development, was not increased despite the miRNAs  
383 targeting them being lowly expressed. Likewise, positive proportional expression interactions  
384 were observed in the *EMB2204* gene copy (Figure 5), whereas an inversely proportional relation  
385 between the miRNA and mRNA target was found for the *EMB2016* ortholog copy. Both copies  
386 are linked to embryo development yet are differently regulated, hence further research is  
387 required to elucidate their role in seed formation. *PHABULOSA*, and possibly *PHAVOLUTA*,  
388 are positive regulators of the (*LEAFY COTYLEDON 2*) gene which is a regulator of seed  
389 maturation (Tang et al., 2012). A BLAST search from the *A. thaliana* Araport 11 assembly  
390 (Cheng et al., 2017) *LEC2* coding sequence (*ATIG28300.1*) revealed a single hit that passed  
391 the filtering criteria specified for miRNA targets in Materials and Methods. The ortholog  
392 corresponded to the *C05p022870.1\_BnaEXP* gene model in the Express 617 assembly (Lee et  
393 al., 2020) and it was found to be differentially expressed likewise in late seed development  
394 (Table S17 and S24) which highlights the putative broader and indirect impact from miRNAs  
395 through gene network interactions.

## 396 **Methylated features in early seed formation**

397 Methylation levels were higher in the CpG contexts with an average of 80% in all stages and  
398 genotypes as illustrated in Fig. 6, while CHH context showed the lowest methylation levels  
399 ranging from 20% to 27% despite having the highest number of methylated cytosines (Table  
400 S25, Fig S11-S14). No methylation bias per chromosome was observed (Table S25).  
401 Approximately 12%, 14% and 10% of DMRs were in promoters, exons and introns  
402 respectively, whereas a high percentage of DMRs (43%) were inside repeat motifs (Table S26).  
403 Repetitive sequences account for 37.5% of the Express 617 genome (Lee et al. 2020), and  
404 although 66% of repeats were methylated with an average 41% methylation level, less than 1%  
405 were differentially methylated (Table S27). Most differentially methylated transposable  
406 element (TE) families and superfamilies coincided with those that are more present in the  
407 Express 617 reference such as LTR (long terminal repeat) Copia and Gypsy families and  
408 approximately 70% of them were in 5 kbp gene flanking regions (Table S28-S29). Chi-square  
409 tests followed by FDR adjusted post-hoc testing at  $p > 0.05$  showed that there is a significant  
410 association between the analyzed genomic features and distance to genes and DEGs (Table  
411 S30). The analyzed features included DMRs as well as differentially methylated and non-  
412 methylated DE-siRNAs and TEs. Interestingly, around 70% of features were in 5 kbp gene  
413 flanking regions; nevertheless, only 20% of them were found in 5kbp DEGs flanking regions

414 (Table S30). This finding, along with only 1% of all genes being differentially methylated  
415 (Table S31), points out to a putative conservative gene regulation across genotypes.

416 Moreover, 392 genes that were both differentially expressed and differentially methylated were  
417 regarded as putative epialleles and are listed on Table S32. Although no gene ontology  
418 enrichment was found on putative epialleles, they covered diverse biological functions such as  
419 DNA transcription, carbohydrate and lipids metabolic processes and photosynthesis (Table  
420 S33). Interestingly, both the gene body and its promoter were methylated in most putative  
421 genetic epialleles (Table S34). Most DMRs were less than 5 kbp away from a gene, hence  
422 revealing a potential regulatory role (Fig.6 and Fig. S11-S14). Both proportional and inversely  
423 proportional relationships were detected between gene methylation and gene expression in most  
424 stage comparisons (Fig. S15-S17), nevertheless, more proportional interactions in which  
425 hypomethylated genes were generally upregulated were observed during early seed  
426 development in the hybrid as shown in Figure 7.

427 In addition, 112635 CpG islands were detected in all assigned chromosomes in the Express 617  
428 reference (Lee et al., 2020) with a 363 bp average length and varying concentrations in  
429 centromeric regions (Table S35). While 86% from all found CpG islands were methylated and  
430 had an average 62% methylation level, only 1.35% from them were differentially methylated  
431 (Table S36) hence displaying a putative conservatory role.

#### 432 **Segmental and subgenome expression bias in hybrids**

433 Differential gene expression in genomic segments was preliminary observed through circos  
434 plots displaying expression patterns for each chromosome, genotype and stage. The presence  
435 of putative expression clusters was assessed more precisely through a 500 kbp genome-wide  
436 binning approach were consistent DEGs patterns per segment, chromosome, genotype and stage  
437 were grouped as described in Materials and Method. Consequently, a 144 differentially  
438 expressed segments across genotypes and stages were determined (Table S37). More  
439 differentially expressed segments were found in the A subgenome and most segments found in  
440 F0 comparisons followed the same expression patterns from the maternal parent Express 617  
441 as shown in Table S37 and in the example on chrA03 in Fig. 7. Available genomics reads from  
442 G3D001 pollinated ovules were employed to discard that the observed patterns were due to  
443 genomic rearrangements (Table S38). Large scale deletions were found only in chromosome  
444 C01 in G3D001 which accounts for the low expression found on the deleted segments in that  
445 chromosome locus (Fig. S19-S20, Table S37). However, no large-scale rearrangements were  
446 found in chromosome A03 in G3D001 (Fig. S21) as to explain the observed low expression as  
447 part of a large deletion effect in both early (15 days) and late (30 days) seed development stages  
448 (Fig. 8 and Fig. S22). Moreover, no duplication seems to be present in Express 617 as to account  
449 for its high expression, since neither the F1 nor the F0 showed a high expression pattern that  
450 could have been inherited from a large-scale duplication from the Express 617 genotype  
451 (Fig.S23-24). No specific relations were found in terms of methylation level, repeat density or  
452 relative position to centromere. This altogether leads us to hypothesize that such segment  
453 follows the maternal expression patterns more than other chromosomal loci. The mechanisms  
454 of such phenomenon could be associated to parental roles during embryo development,  
455 genomic imprinting or chromatin activity and/or genome accessibility for transcription;  
456 however, it requires further research to be elucidated.

457

458

459

## 460 Discussion

461 In the present study, features with differential expression and methylation patterns in hybrids  
462 were detected during seed development and seedling stages. Most DEGs in the hybrids showed  
463 maternal and paternal dominances regardless of the tissue and stage (Table 1). Similar parental  
464 gene expression dominance has been reported in oilseed rape and cotton (Yoo et al., 2013; Wu  
465 et al., 2018; Wei et al., 2021). Furthermore, Li et al. (2020) demonstrated that EDL can vary  
466 based on the sampled tissue, where stems and leaves showed more additive gene expression in  
467 *B. napus* when compared to the expression from its phylogenetic ancestors *B.rapa* and  
468 *B.oleracea*. Gene expression additivity was also reported by L. Zhang et al. (2021) as a main  
469 expression dominance level pattern factor in excised pod sections in crosses from *Raphanus*  
470 *sativus* (RR, 2n =18) and *B. oleracea*, whereas the rest of seed and pod dissected regions  
471 displayed more paternal dominances. The diversity of sampled tissues, species and genotypes  
472 in the previous studies and ours could account for the contrasting EDL observed. Differential  
473 gene expression was also observed in large segments; and was not necessarily related to  
474 genomic rearrangements (Table S37, Fig. 8). Chromatin rearrangement and transcription  
475 accessibility could be one reason explaining the large-scale differentially expressed segments  
476 observed. Unfortunately, not enough tissue material was available in all stages to discard  
477 expression bias because of genomic rearrangements since all sequencing types were carried  
478 from the same tissue. One recent alternative to overcome this issues is proposed through new  
479 structural variant callers that work directly on RNA-Seq data to call copy number variation  
480 (CNVs) without the need of genomic data (Serin Harmanci et al., 2020).

481 Additionally, pollinated ovules that would become F1 plants, F0 genotype, showed a higher  
482 similarity to the maternal genotype Express 617 in terms of gene expression, small RNA  
483 expression and methylation which might be due to the triploid nature of the endosperm having  
484 two maternal copies and one paternal copy through double-fertilization as discussed in Jahnke  
485 et al. (2010). Seeds are composed by a seed coat, an embryo and an endosperm, with the latter  
486 generally accounting for the largest volume in the seed. Although the separation from all seed  
487 components was out of the scope in our study; recent transcriptomic profiling of the  
488 aforementioned tissues through laser microdissection has been employed to characterize the  
489 transcriptomic profiles during seed formation in *A.thaliana* and *B.napus* (Kirkbride et al., 2019;  
490 Ziegler et al., 2019; Khan et al., 2022).

491 Subgenomic expression bias has been reported earlier in Brassica species (Bird et al., 2018;  
492 Bird et al., 2021a; Q. Zhang et al., 2021); therefore, expression bias of differentially expressed  
493 up- and downregulated genes was investigated in each genotype and stage per subgenome.  
494 Despite no subgenome bias in gene expression being detected, more genes were differentially  
495 upregulated in G3D001 than in Express 617 (Table S15, Figures S1-S5). The observed  
496 genotype-specific bias can be a result of the following genomic, transcriptomic and epigenomic  
497 factors. Firstly, genomic rearrangements such as structural variations and gene copy number  
498 variations are known to affect various traits in polyploid plants (Schiessl et al., 2017; Vollrath  
499 et al., 2021; Makhoul et al., 2022) and could have led to potential biases in expression patterns.  
500 Transcriptomic aspects such as gene isoforms, gene network interactions and allele expression  
501 bias might also be involved in favoring the up or down regulation from a certain genotype or  
502 haplotype (Fan et al., 2020; Schiessl et al., 2020; Golicz et al., 2021). Lastly, epigenomic factors  
503 like parental gamete methylation mechanisms, genomic imprinting as well as difference  
504 between the parents *cis-trans* regulating factors, miRNA isoforms (isomiRs) and TE families  
505 and densities could all result into potential genotype or haplotype biased expression (Jain et al.,  
506 2018; Go and Civetta, 2020; Gill et al., 2021).

507 Approximately 12-18% of features shared in at least 2-3 stages followed maternal dominant  
508 patterns as shown in Fig. 3, hence, highlighting the relevance of maternal genotype in

509 transcriptomic and epigenomic scenarios. Furthermore, less than 3% from all expression and  
510 methylation features had the same expression and methylation patterns across all stages (Table  
511 S16), indicating that the role of those features might be more essential throughout seed and  
512 early seedling development. Complete lists of all features are provided in Table S17-S20 to  
513 allow further feature assessment in the context of seed development in hybrids. In addition,  
514 gene ontology enrichment showed enrichment for key biological functions involved in growth  
515 and development (Fig. 4, Table S21). Furthermore, DEGs involved in reproduction and meiotic  
516 functions were detected as having a transgressive upregulated expression in 15 days after  
517 pollination ovules in seeds from selfed-F1 plants. The list of all DEGs with GO enrichment  
518 have a potential for seed development in hybrids and are available on Supplementary Tables  
519 S21-S22.

520 Differentially expressed miRNAs analysis in early and late seed development showed miRNA  
521 families normally involved in plant growth and development (Plotnikova et al., 2019; Dong et  
522 al., 2022; Verma et al., 2022). miR172 regulates not only the flowering time pathway, but also  
523 embryo development through controlling of *AP2* (*APETALA 2*) and *AP2-like* genes such as  
524 *TOE2* as reported in previous studies (Boutillier et al., 2002; Shivaraj et al., 2018; Nowak et al.,  
525 2022). miR165/166 families control leaf adaxial/abaxial development and embryogenesis by  
526 targeting the class III homeodomain leucine zipper (HD-ZIP III) transcription factor gene  
527 family which includes the *REVOLUTA*, *PHAVOLUTA* and *PHABULOSA* genes as discussed  
528 in Wang et al. (2007) and Tang et al. (2012). Both *PHABULOSA* and *PHAVOLUTA* have been  
529 described to indirectly regulate *LEC2*, a gene that promotes embryo formation in Arabidopsis  
530 and seed size and seed lipid biosynthesis in *B. napus* (Braybrook et al., 2006; Tang et al., 2012;  
531 Wójcik et al., 2017; Miller et al., 2019). miR169 targets *CBF* (*C-REPEAT BINDING*  
532 *FACTORS*) and *NF-YA* (*NUCLEAR FACTOR YA*) genes as described in Dong et al. (2022);  
533 however, in our study, miR160 targeted an *EMB2016* (*EMBRYO DEFECTIVE 2016*) gene copy  
534 during late seed development. *EMB2016* is a member of the EMB family which are critical for  
535 embryo development (Tzafrir et al., 2004; Růžička et al., 2017; Meinke, 2020). *EMB2204*  
536 (*EMBRYO DEFECTIVE 2204*), is another EMB family member, which was targeted by  
537 miR3629 in the present study. miR3629 was first reported in *Vitis vinifera* cv. Pinot Noir by  
538 Pantaleo et al. (2010) and has been reported in *Camellia azalea*, in chilling response in *Prunus*  
539 *persica* as well as in disease susceptibility in *V. vinifera* cv. Bosco and *V. vinifera* cv.  
540 Chardonnay (Barakat et al., 2012; Pantaleo et al., 2016; Yin et al., 2016; Snyman et al., 2017).  
541 miR9410 has been detected in *B. oleracea* and *B. rapa* (Lukasik et al., 2013; Zhang et al., 2018),  
542 yet no clear function information for miR9410 exists for Brassica species. In our study, miR9410  
543 targeted a *filamentation temperature sensitive protein H 1* (*FtsH7*) gene copy encoding a  
544 protease that in turns degrades D1 protein in photosystem II. *FtsH* genes have been reported in  
545 tomato, sorghum, Arabidopsis and *B.napus* (Xu et al., 2021; Yi et al., 2022).

546 Differential expression from targets of the aforementioned miRNA families was observed in  
547 our studies during seed development, and further target validation through degradome  
548 sequencing (German et al., 2008), precise isomiRs classification (Morin et al., 2008; Sablok et  
549 al., 2015; Yang et al., 2019), target knock-out experiments (Jain et al., 2018; Wei et al., 2018;  
550 Li et al., 2021) as well as gene co-expression networks (Schiessl et al., 2020) can prove  
551 beneficial for identifying their role in seed and embryo formation in *B.napus*. A list of  
552 differential miRNA sequences and their putative targets are found in Tables S23-S24 for further  
553 validation.

554 The number of methylated cytosines in the CHH context was overall higher in all genotypes  
555 compared to other contexts; nonetheless, while methylation levels were higher in CpG and CHG  
556 contexts as also observed in multiple plants species (Niederhuth et al., 2016; Bartels et al.,  
557 2018). Methylation is generally associated with gene downregulation through transcription



558 inhibition as shown in Fig.7. Nevertheless, hypermethylation and hypomethylation were also  
559 linked with up- and downregulation respectively (Fig. S15-S17). Proportional gene  
560 hypermethylation and gene upregulation was observed in mice and human cells (Arechederra  
561 et al., 2018; Rauluseviciute et al., 2020); however, no mechanisms explaining gene activation  
562 through hypermethylation are fully known so far; hence, further research in this topic would  
563 elucidate the interactions between methylation and gene regulation.

564 Moreover, methylation was evaluated during seed development in our study since parental  
565 asymmetric methylation and genomic imprinting occurs mostly at that stage in flowering plants  
566 (Batista and Köhler, 2020). DNA hypomethylation of the female gamete and paternal gamete  
567 hypermethylation has been reported in most flowering plants like Arabidopsis, rice and maize  
568 endosperm (Gehring et al., 2009; Zemach et al., 2010; Zhang et al., 2014). Contrastingly, we  
569 observed more maternal hypermethylation and paternal hypomethylation in the F0. Similar  
570 parental methylation trends were also observed in the F1 despite allele segregation. Such  
571 patterns were also reported by Liu et al. (2018) in *B.napus* and by Grover et al. (2020) in  
572 *B.rapa*. One possible explanation for this was proposed by the latter authors, where siRNAs in  
573 endosperm (siren siRNAs) were highly expressed in the seed coat and could trigger a maternal  
574 DNA methylation control in seed development through the movement of maternally expressed  
575 siRNAs from the seed coat or maternal-specific expression in the endosperm.

576 The molecular mechanisms and effects of genomic imprinting, where an allele follows a  
577 parental expression pattern due to inherited epigenomic modifications, is restricted mostly to  
578 the endosperm rather to the embryo in flowering plants, and has been extensively discussed in  
579 Weigel and Colot (2012), and Batista and Köhler (2020). The role of imprinted genes has been  
580 linked to chromatin modification, hormone biosynthesis, nutrient transfer, endosperm  
581 proliferation and seed size regulation as reviewed by Jiang and Köhler (2012) and Batista and  
582 Köhler (2020). Furthermore, Rong et al. (2021) reported the enrichment of transposable  
583 elements in imprinted genes in *B. napus* located in 5 kbp flanking regions. Cao et al. (2022)  
584 analyzed imprinted genes in six backcrossing generations of maize as well as in three selfing  
585 generations derived from the 6<sup>th</sup> backcross. It was proposed that the divergence between TEs  
586 derived from 24-nt siRNAs in the parental maize genomes might have led to transgenerational  
587 inheritance of imprinted genes. Putative imprinted genes were found in the seedling and seed  
588 development stages in our study (Table S32) for future confirmation through genomic  
589 sequencing and phenotypic data.

590 Most frequently differentially methylated transposable elements corresponded to those more  
591 abundant in the Express 617 reference (Lee et al., 2020) like the Copia and Gypsy families.  
592 Transposable elements are considered not only as key factors in speciation and subgenome  
593 expression patterns (Bird et al., 2018; Bottani et al., 2018; Bird et al., 2021b) but also as  
594 genomic features with high variability across plant species (Novák et al., 2020; Mhiri et al.,  
595 2022). In addition, comparison of transposable element densities and compositions between  
596 Express 617 and G3D001 through genome assembly of the latter would provide more insights  
597 into how TEs diverge during seed development and between cultivars.

598 siRNAs are known to mediate silencing of transposable elements via the RNA-directed DNA  
599 methylation (RdDM) pathway. At the same time, TEs are a source of sRNAs, including  
600 siRNAs, that could potentially silence TEs through a post-transcriptional gene silencing  
601 (PTGS) process as discussed in Matzke and Mosher (2014) and Gill et al. (2021). Similarly to  
602 Rong et al. (2021) most differentially methylated TEs were found in 5 kbp gene flanking  
603 regions, as expected since 78% of TEs are in such loci in the employed Express 617 reference  
604 (Lee et al., 2020). Our results also outline that most TEs, DMRs and DE-siRNAs converged in

605 5 kbp gene flanking regions rather than in 5 kbp DEG flanking regions (Tables S30); thus,  
606 highlighting a putative conservation of most genetic functions by reducing the number of  
607 DMRs, DE-siRNAs and differentially methylated TEs in the proximity of DEGs. Additionally,  
608 most CpG islands were not differentially methylated between genotypes hence indicating a  
609 potential epigenomic and transcriptomic conservative role (Table S35). CpG islands are known  
610 to have diverse functions in plants (Ashikawa, 2001) and have also been analyzed in recent  
611 studies with Brassica species (Perumal et al., 2020; Park et al., 2021).

612 Expression and methylation dominance levels are a fast way of interpreting -omics data, and  
613 to our knowledge, the present study is the first one to analyze expression and methylation  
614 dominance level patterns in hybrids derived from two *Brassica napus* parents. Recent advances  
615 in allele specific expression (Fan et al., 2020; Sands et al., 2021), isoform expression (Vitting-  
616 Seerup and Sandelin, 2019; Yao et al., 2020; Golicz et al., 2021), gene fusion and dosage  
617 (Mahmoud et al., 2019; Serin Harmanaci et al., 2020; Bird et al., 2021b) as well as non-germline  
618 -omics variations among F1 plants and populations (Higgins et al., 2018; Cortijo et al., 2019;  
619 Orantes-Bonilla et al., 2022; Quezada-Martinez et al., 2022) would prove useful in improving  
620 the resolution of ELD and MLD analyses. Furthermore, multi-omics features have been  
621 employed in genomic selection in plants; hence, defining the role from each -omic feature per  
622 stage could be used to enhance expression and phenotype prediction modelling in *B.napus*  
623 (Seifert et al., 2018; Zrimec et al., 2020; Cheng et al., 2021; H. Hu et al., 2021; Knoch et al.,  
624 2021). Altogether our findings highlight the transcriptomics and epigenomic differences  
625 between early developmental stages in F1 and F0, and a similarity of the latter to Express 617  
626 in terms of methylation level as well as in gene and small RNA expression. Differentially  
627 expressed and methylated features detected during seed development were identified and are  
628 provided in the present study for further research. Future developments in sequencing and  
629 bioinformatics will aid in elucidating the role and interactions of each transcriptomic and  
630 epigenomic feature at a higher resolution.

631

## 632 **Data availability and statement**

633

634 mRNA, sRNA and WGBS libraries and fragment count datasets generated in this study are  
635 found in the GEO data repository under accession GSE202610. G3D001 genomic reads from  
636 self-pollinated ovules are found in NCBI Bioproject PRJNA850551.

## 637 **Author contributions**

638

639 RS and JZ conceived and supervised the study. MOB drafted the manuscript and designed the  
640 bioinformatic analyses. HW conducted bioinformatic studies, generated crosses, extracted and  
641 sampled pollinated ovules for sequencing and contributed to data analysis. DH carried and  
642 supervised the field experiment. WL contributed to experimental trials and HTL carried genome  
643 syntheny analyses and contributed to whole-genome bisulfite and mRNA analyses. AAG  
644 contributed in transcriptomic and epigenomic features analyses. All authors read and approved  
645 the manuscript.

646

647

648 **Funding**

649

650 This research was carried under the Joint Sino-German Research (2018) frame and was  
651 sponsored by the German Research Foundation (DFG, grant number SN14/22-1 to RJS) and  
652 the National Natural Science Foundation of China (NSFC, grant number 31861133016 to JZ).

653 **Conflict of interest**

654

655 The authors declare that the research was conducted in the absence of any commercial or  
656 financial relationships that could be construed as a potential conflict of interest.

657 **Acknowledgements**

658

659 We would like to acknowledge the support from the BMBF-funded de.NBI Cloud within the  
660 German Network for Bioinformatics Infrastructure (de.NBI) and the Bioinformatics Core  
661 Facility at JLU for the provided bioinformatic resources and support. The experimental design  
662 was created with BioRender.com.

663 **Supplementary Information**

664

665 Supplementary Figures 1–24

666 Supplementary Tables 1–38

667

668 **Figure legends**

669

670 **Figure 1. Transcriptomic and epigenomic experimental design.** Leaves samples were  
671 taken at the six-leaves stages (BBCH16). Express 617, G3D001 and their respective F1 were  
672 selfed. Likewise, the parents were crossed during the experiment to develop pollinated ovules  
673 (F0). Pollinated ovules were sampled and sequenced 15 (OS15) and 30 (OS30) days after  
674 pollination.

675

676 **Figure 2. Percentages of differentially expressed genes (DEGs), differentially expressed**  
677 **miRNAs (DE-miRNAs) differentially expressed siRNAs (DE-siRNAs), and differentially**  
678 **methylated regions (DMRs) in CpG and CHG methylation contexts by expression level**  
679 **dominance (ELD) and methylation level dominance (MLD) patterns per stage.** Increase  
680 and decrease in expression and methylation per pattern are displayed in dot-ended lines where  
681 the dot and E, G and F abbreviations represent the Express 617, G3D001 and F1/F0 genotypes  
682 respectively. Percentages are displayed with colored backgrounds to represent high (red) or low  
683 (blue) abundance.

684

685 **Figure 3. Percentage of shared differential features between stages based on dominance**  
686 **level patterns displaying differential expressed genes (DEGs), differentially expressed**  
687 **miRNAs (DE-miRNAs), differentially expressed siRNAs (DE-siRNAs) and differentially**  
688 **methylated regions (DMRs) in CpG and CHG contexts.**

689

690 **Figure 4. Gene expression heatmap (a) and gene ontology (GO) enrichment of biological**  
691 **processes (b) from 15 days after pollination ovules with transgressive upregulation**  
692 **patterns in the F1.**

693

694 **Figure 5. Selected normalized expression from differential expressed miRNA (DE-**  
695 **miRNA) and their differential expressed target gene (DEG) in 30 days after pollination**  
696 **ovules in the F1 and parental genotypes. a, Inversely proportional miRNA-mRNA target**  
697 **expression. b, Proportional miRNA-mRNA target expression.**

698

699 **Figure 6. Methylation patterns in 15 days after pollination ovules from F0 and parents. a,**  
700 **Methylation level per genotype and DNA methylation context. b, Count of methylated**  
701 **cytosines in million (M) scale per genotype and DNA methylation context. c, Distribution of**  
702 **differentially methylated regions (DMRs) across introns, exons, repeats and promoters (1 kbp**  
703 **upstream from gene start). d, Distribution of methylated differential expressed genes (DEGs)**  
704 **and their promoters. e, Kernel density estimation (KED)-based distribution of DMRs distance**  
705 **to closest gene. A dotted line is used to delimit DMRs located 5 kbp from a gene.**

706

707 **Figure 7. Gene expression and gene methylation in CpG and CHG contexts from 15 days**  
708 **after pollination ovules displaying transgressive patterns in the F0 and its parents. Genes**  
709 **are sorted in the same order in both heatmaps.**



710 **Figure 8. Differentially expressed genes (DEGs) and methylation levels from 15 days after**  
711 **pollination ovules from F0 and parents in chromosome A03.** Outer to inner tracks  
712 correspond to: **a**, predicted centromere loci in black; **b**, repeat density per 1 kbp bin; **c-e**,  
713 Express 617, F0 and G3D001 DEGs regulation; **f-h**, Express 617, F0 and G3D001 methylation  
714 levels per 1 kbp bin. Differential expression segment starting at approximately 11 Mbp to 18.8  
715 Mbp is highlighted in orange

716

717 **Table 1. Predicted mRNA target from differentially expressed miRNAs (DE-miRNAs) in 15 and 30 days after pollination ovules in F1 and**  
 718 **parents by expression level dominance (ELD).**

719

| Stage             | Predicted DE miRNA family | DE miRNA-ELD        | miRNA-Target        | miRNA-target-ELD | <i>A. thaliana</i> homolog ID | <i>A. thaliana</i> homolog name |
|-------------------|---------------------------|---------------------|---------------------|------------------|-------------------------------|---------------------------------|
| <b>OS15-F1</b>    | miRNA 165/166 A           | IX                  | C04p041520.1_BnaEXP | IX               | AT2G34710                     | PHABULOSA                       |
|                   | miRNA 165/166 B           |                     |                     |                  |                               |                                 |
|                   | miRNA 165/166 C           |                     |                     |                  |                               |                                 |
| <b>OS30-F1</b>    | miRNA 3629 A              | VIII                | A02p005120.1_BnaEXP | VIII             | AT1G22090                     | EMB2204                         |
|                   | miRNA 166 A               | IX                  | C04p041520.1_BnaEXP | IX               | AT2G34710                     | PHABULOSA                       |
|                   | miRNA 165/166 B           |                     |                     |                  |                               |                                 |
|                   | miRNA 166 B               |                     |                     |                  |                               |                                 |
|                   | miRNA 166 C               |                     |                     |                  |                               |                                 |
|                   | miRNA 166 A               | IX                  | C05p024820.1_BnaEXP | XII              | AT1G30490                     | PHAVOLUTA                       |
|                   | miRNA 165/166 B           |                     |                     |                  |                               |                                 |
|                   | miRNA 166 B               |                     |                     |                  |                               |                                 |
| miRNA 166 C       | IX                        | A06p017700.1_BnaEXP | VII                 | AT3G47060        | FTSH PROTEASE 7               |                                 |
| miRNA 9410/9411 A |                           |                     |                     |                  |                               |                                 |
| miRNA 9410 A      |                           |                     |                     |                  |                               |                                 |
| miRNA 165/166 B   |                           |                     |                     |                  |                               |                                 |
| miRNA 169 A       |                           |                     |                     |                  |                               |                                 |
| miRNA 172 A       | IX                        | C09p033660.1_BnaEXP | IX                  | AT5G60120        | TOE2                          |                                 |

720

## 721 References

- 722 Alonso-Peral, M. M., Trigueros, M., Sherman, B., Ying, H., Taylor, J. M., Peacock, W. J., et  
723 al. (2017). Patterns of gene expression in developing embryos of Arabidopsis hybrids. *Plant*  
724 *J* 89, 927–939. doi: 10.1111/tpj.13432
- 725 Altschul, S. F., Gish, W., Miller, W., Myers, E. W., and Lipman, D. J. (1990). Basic local  
726 alignment search tool. *Journal of Molecular Biology* 215, 403–410. doi: 10.1016/S0022-  
727 2836(05)80360-2
- 728 Andrew S. (2010). *FastQC: A Quality Control Tool for High Throughput Sequence Data*.  
729 <https://www.bioinformatics.babraham.ac.uk/projects/fastqc> (Accessed 2021)
- 730 Arechederra, M., Daian, F., Yim, A., Bazai, S. K., Richelme, S., Dono, R., et al. (2018).  
731 Hypermethylation of gene body CpG islands predicts high dosage of functional oncogenes  
732 in liver cancer. *Nat Commun* 9, 3164. doi: 10.1038/s41467-018-05550-5
- 733 Ashikawa, I. (2001). Gene-associated CpG islands in plants as revealed by analyses of genomic  
734 sequences. *Plant J* 26, 617–625. doi: 10.1046/j.1365-313x.2001.01062.x
- 735 Axtell, M. J. (2013). Classification and comparison of small RNAs from plants. *Annu Rev Plant*  
736 *Biol* 64, 137–159. doi: 10.1146/annurev-arplant-050312-120043
- 737 Babicki, S., Arndt, D., Marcu, A., Liang, Y., Grant, J. R., Maciejewski, A., et al. (2016).  
738 Heatmapper: web-enabled heat mapping for all. *Nucleic Acids Res* 44, W147-53. doi:  
739 10.1093/nar/gkw419
- 740 Barakat, A., Sriram, A., Park, J., Zhebentyayeva, T., Main, D., and Abbott, A. (2012). Genome  
741 wide identification of chilling responsive microRNAs in *Prunus persica*. *BMC Genomics* 13,  
742 481. doi: 10.1186/1471-2164-13-481
- 743 Bartels, A., Han, Q., Nair, P., Stacey, L., Gaynier, H., Mosley, M., et al. (2018). Dynamic DNA  
744 Methylation in Plant Growth and Development. *Int J Mol Sci* 19. doi: 10.3390/ijms19072144
- 745 Batista, R. A., and Köhler, C. (2020). Genomic imprinting in plants-revisiting existing models.  
746 *Genes Dev* 34, 24–36. doi: 10.1101/gad.332924.119
- 747 Batista, R. A., Moreno-Romero, J., Qiu, Y., van Boven, J., Santos-González, J., Figueiredo, D.  
748 D., et al. (2019). The MADS-box transcription factor PHERES1 controls imprinting in the  
749 endosperm by binding to domesticated transposons. *Elife* 8. doi: 10.7554/eLife.50541
- 750 Bird, K. A., Niederhuth, C. E., Ou, S., Gehan, M., Pires, J. C., Xiong, Z., et al. (2021a).  
751 Replaying the evolutionary tape to investigate subgenome dominance in allopolyploid  
752 *Brassica napus*. *New Phytol* 230, 354–371. doi: 10.1111/nph.17137
- 753 Bird, K. A., Pires, J. C., VanBuren, R., Xiong, Z., and Edger, P. P. (2021b). *Gene dosage*  
754 *constraints affect the transcriptional response to allopolyploidy and homoeologous exchange*  
755 *in resynthesized Brassica napus*.
- 756 Bird, K. A., VanBuren, R., Puzey, J. R., and Edger, P. P. (2018). The causes and consequences  
757 of subgenome dominance in hybrids and recent polyploids. *New Phytol* 220, 87–93. doi:  
758 10.1111/nph.15256
- 759 Bottani, S., Zabet, N. R., Wendel, J. F., and Veitia, R. A. (2018). Gene Expression Dominance  
760 in Allopolyploids: Hypotheses and Models. *Trends Plant Sci* 23, 393–402. doi:  
761 10.1016/j.tplants.2018.01.002
- 762 Bourque, G., Burns, K. H., Gehring, M., Gorbunova, V., Seluanov, A., Hammell, M., et al.  
763 (2018). Ten things you should know about transposable elements. *Genome Biol* 19, 199. doi:  
764 10.1186/s13059-018-1577-z
- 765 Boutilier, K., Offringa, R., Sharma, V. K., Kieft, H., Ouellet, T., Zhang, L., et al. (2002).  
766 Ectopic expression of BABY BOOM triggers a conversion from vegetative to embryonic  
767 growth. *Plant Cell* 14, 1737–1749. doi: 10.1105/tpc.001941
- 768 Braybrook, S. A., Stone, S. L., Park, S., Bui, A. Q., Le, B. H., Fischer, R. L., et al. (2006).  
769 Genes directly regulated by LEAFY COTYLEDON2 provide insight into the control of

- 770 embryo maturation and somatic embryogenesis. *Proc Natl Acad Sci U S A* 103, 3468–3473.  
771 doi: 10.1073/pnas.0511331103
- 772 Cao, L., Yu, N., Li, J., Qi, Z., Wang, D., and Chen, L. (2016). Heritability and Reversibility of  
773 DNA Methylation Induced by in vitro Grafting between *Brassica juncea* and *B. oleracea*. *Sci*  
774 *Rep* 6, 27233. doi: 10.1038/srep27233
- 775 Cao, S., Wang, L., Han, T., Ye, W., Liu, Y., Sun, Y., et al. (2022). Small RNAs mediate  
776 transgenerational inheritance of genome-wide trans-acting epialleles in maize. *Genome Biol*  
777 23, 53. doi: 10.1186/s13059-022-02614-0
- 778 Catoni, M., Tsang, J. M., Greco, A. P., and Zabet, N. R. (2018). DMRcaller: a versatile  
779 R/Bioconductor package for detection and visualization of differentially methylated regions  
780 in CpG and non-CpG contexts. *Nucleic Acids Res* 46, e114. doi: 10.1093/nar/gky602
- 781 Chalhoub, B., Denoeud, F., Liu, S., Parkin, I. A. P., Tang, H., Wang, X., et al. (2014). Plant  
782 genetics. Early allopolyploid evolution in the post-Neolithic *Brassica napus* oilseed genome.  
783 *Science* 345, 950–953. doi: 10.1126/science.1253435
- 784 H. Chen, T. Wang, X. He, X. Cai, R. Lin, J. Liang, et al. (2022). BRAD V3.0: an upgraded  
785 Brassicaceae database. *Nucleic Acids Res* 50, D1432-D1441. doi: 10.1093/nar/gkab1057
- 786 L. Chen, Y. Zhu, X. Ren, D. Yao, Y. Song, S. Fan, et al. (2022). Heterosis and Differential  
787 DNA Methylation in Soybean Hybrids and Their Parental Lines. *Plants (Basel)* 11. doi:  
788 10.3390/plants11091136
- 789 Chen, S., Zhou, Y., Chen, Y., and Gu, J. (2018). fastp: an ultra-fast all-in-one FASTQ  
790 preprocessor. *Bioinformatics* 34, i884-i890. doi: 10.1093/bioinformatics/bty560
- 791 Cheng, C.-Y., Krishnakumar, V., Chan, A. P., Thibaud-Nissen, F., Schobel, S., and Town, C.  
792 D. (2017). Araport11: a complete reannotation of the *Arabidopsis thaliana* reference genome.  
793 *Plant J* 89, 789–804. doi: 10.1111/tpj.13415
- 794 Cheng, C.-Y., Li, Y., Varala, K., Bubern, J., Huang, J., Kim, G. J., et al. (2021). Evolutionarily  
795 informed machine learning enhances the power of predictive gene-to-phenotype  
796 relationships. *Nat Commun* 12, 5627. doi: 10.1038/s41467-021-25893-w
- 797 Cortijo, S., Aydin, Z., Ahnert, S., and Locke, J. C. (2019). Widespread inter-individual gene  
798 expression variability in *Arabidopsis thaliana*. *Mol Syst Biol* 15, e8591. doi:  
799 10.15252/msb.20188591
- 800 Cunningham, F., Allen, J. E., Allen, J., Alvarez-Jarreta, J., Amode, M. R., Armean, I. M., et al.  
801 (2022). Ensembl 2022. *Nucleic Acids Res* 50, D988-D995. doi: 10.1093/nar/gkab1049
- 802 Dai, X., Zhuang, Z., and Zhao, P. X. (2018). psRNATarget: a plant small RNA target analysis  
803 server (2017 release). *Nucleic Acids Res* 46, W49-W54. doi: 10.1093/nar/gky316
- 804 Dainat J. (2019). *AGAT: Another Gff Analysis Toolkit to handle annotations in any GTF/GFF*  
805 *format. (Version v0.5.0)*. <https://www.doi.org/10.5281/zenodo.3552717> (Accessed 2020)
- 806 Dong, Q., Hu, B., and Zhang, C. (2022). microRNAs and Their Roles in Plant Development.  
807 *Front Plant Sci* 13, 824240. doi: 10.3389/fpls.2022.824240
- 808 Doyle, J. J., and Doyle, J. (1987). A Rapid DNA Isolation Procedure for Small Quantities of  
809 Fresh Leaf Tissue. *Phytochemical Bulletin* 19, 11–15.
- 810 Ewels, P., Magnusson, M., Lundin, S., and Käller, M. (2016). MultiQC: summarize analysis  
811 results for multiple tools and samples in a single report. *Bioinformatics* 32, 3047–3048. doi:  
812 10.1093/bioinformatics/btw354
- 813 Fan, J., Hu, J., Xue, C., Zhang, H., Susztak, K., Reilly, M. P., et al. (2020). ASEP: Gene-based  
814 detection of allele-specific expression across individuals in a population by RNA sequencing.  
815 *PLoS Genet* 16, e1008786. doi: 10.1371/journal.pgen.1008786
- 816 Feschotte, C. (2004). Merlin, a new superfamily of DNA transposons identified in diverse  
817 animal genomes and related to bacterial IS1016 insertion sequences. *Mol Biol Evol* 21, 1769–  
818 1780. doi: 10.1093/molbev/msh188
- 819 Fitz-James, M. H., and Cavalli, G. (2022). Molecular mechanisms of transgenerational  
820 epigenetic inheritance. *Nat Rev Genet* 23, 325–341. doi: 10.1038/s41576-021-00438-5



- 821 Fujimoto, R., Uezono, K., Ishikura, S., Osabe, K., Peacock, W. J., and Dennis, E. S. (2018).  
822 Recent research on the mechanism of heterosis is important for crop and vegetable breeding  
823 systems. *Breed Sci* 68, 145–158. doi: 10.1270/jsbbs.17155
- 824 Gao, C., Zhou, G., Ma, C., Zhai, W., Zhang, T., Liu, Z., et al. (2016). Helitron-like transposons  
825 contributed to the mating system transition from out-crossing to self-fertilizing in polyploid  
826 *Brassica napus* L. *Sci Rep* 6, 33785. doi: 10.1038/srep33785
- 827 Gardiner-Garden, M., and Frommer, M. (1987). CpG Islands in vertebrate genomes. *Journal of*  
828 *Molecular Biology* 196, 261–282. doi: 10.1016/0022-2836(87)90689-9
- 829 Ge, S. X., Jung, D., and Yao, R. (2020). ShinyGO: a graphical gene-set enrichment tool for  
830 animals and plants. *Bioinformatics* 36, 2628–2629. doi: 10.1093/bioinformatics/btz931
- 831 Ge, S. X., Son, E. W., and Yao, R. (2018). iDEP: an integrated web application for differential  
832 expression and pathway analysis of RNA-Seq data. *BMC Bioinformatics* 19, 534. doi:  
833 10.1186/s12859-018-2486-6
- 834 Gehring, M., Bubb, K. L., and Henikoff, S. (2009). Extensive demethylation of repetitive  
835 elements during seed development underlies gene imprinting. *Science* 324, 1447–1451. doi:  
836 10.1126/science.1171609
- 837 German, M. A., Pillay, M., Jeong, D.-H., Hetawal, A., Luo, S., Janardhanan, P., et al. (2008).  
838 Global identification of microRNA-target RNA pairs by parallel analysis of RNA ends. *Nat*  
839 *Biotechnol* 26, 941–946. doi: 10.1038/nbt1417
- 840 Gill, R. A., Scossa, F., King, G. J., Golicz, A. A., Tong, C., Snowdon, R. J., et al. (2021). On  
841 the Role of Transposable Elements in the Regulation of Gene Expression and Subgenomic  
842 Interactions in Crop Genomes. *Critical Reviews in Plant Sciences* 40, 157–189. doi:  
843 10.1080/07352689.2021.1920731
- 844 Go, A. C., and Civetta, A. (2020). Hybrid Incompatibilities and Transgressive Gene Expression  
845 Between Two Closely Related Subspecies of *Drosophila*. *Front Genet* 11, 599292. doi:  
846 10.3389/fgene.2020.599292
- 847 Golicz, A. A., Allu, A. D., Li, W., Lohani, N., Singh, M. B., and Bhalla, P. L. (2021). A dynamic  
848 intron retention program regulates the expression of several hundred genes during pollen  
849 meiosis. *Plant Reprod* 34, 225–242. doi: 10.1007/s00497-021-00411-6
- 850 Griffiths-Jones, S., Grocock, R. J., van Dongen, S., Bateman, A., and Enright, A. J. (2006).  
851 miRBase: microRNA sequences, targets and gene nomenclature. *Nucleic Acids Res* 34,  
852 D140-4. doi: 10.1093/nar/gkj112
- 853 Groszmann, M., Gonzalez-Bayon, R., Greaves, I. K., Wang, L., Huen, A. K., Peacock, W. J.,  
854 et al. (2014). Intraspecific Arabidopsis hybrids show different patterns of heterosis despite  
855 the close relatedness of the parental genomes. *Plant Physiol* 166, 265–280. doi:  
856 10.1104/pp.114.243998
- 857 Grover, J. W., Burgess, D., Kendall, T., Baten, A., Pokhrel, S., King, G. J., et al. (2020).  
858 Abundant expression of maternal siRNAs is a conserved feature of seed development. *Proc*  
859 *Natl Acad Sci U S A* 117, 15305–15315. doi: 10.1073/pnas.2001332117
- 860 Gu, Z., Gu, L., Eils, R., Schlesner, M., and Brors, B. (2014). circlize Implements and enhances  
861 circular visualization in R. *Bioinformatics* 30, 2811–2812. doi:  
862 10.1093/bioinformatics/btu393
- 863 Higgins, E. E., Clarke, W. E., Howell, E. C., Armstrong, S. J., and Parkin, I. A. P. (2018).  
864 Detecting de Novo Homoeologous Recombination Events in Cultivated *Brassica napus*  
865 Using a Genome-Wide SNP Array. *G3 (Bethesda)* 8, 2673–2683. doi:  
866 10.1534/g3.118.200118
- 867 D. Hu, J. Jing, R. J. Snowdon, A. S. Mason, J. Shen, J. Meng, et al. (2021). Exploring the gene  
868 pool of *Brassica napus* by genomics-based approaches. *Plant Biotechnol J* 19, 1693–1712.  
869 doi: 10.1111/pbi.13636
- 870 H. Hu, M. T. Campbell, T. H. Yeats, X. Zheng, D. E. Runcie, G. Covarrubias-Pazaran, et al.  
871 (2021). Multi-omics prediction of oat agronomic and seed nutritional traits across

- 872 environments and in distantly related populations. *Theor Appl Genet* 134, 4043–4054. doi:  
873 10.1007/s00122-021-03946-4
- 874 Jahnke, S., Sarholz, B., Thiemann, A., Kühr, V., Gutiérrez-Marcos, J. F., Geiger, H. H., et al.  
875 (2010). Heterosis in early seed development: a comparative study of F1 embryo and  
876 endosperm tissues 6 days after fertilization. *Theor Appl Genet* 120, 389–400. doi:  
877 10.1007/s00122-009-1207-y
- 878 Jain, A., Anand, S., Singh, N. K., and Das, S. (2018). Sequence and functional characterization  
879 of MIRNA164 promoters from Brassica shows copy number dependent regulatory  
880 diversification among homeologs. *Funct Integr Genomics* 18, 369–383. doi:  
881 10.1007/s10142-018-0598-8
- 882 Jian, H., Yang, B., Zhang, A., Ma, J., Ding, Y., Chen, Z., et al. (2018). Genome-Wide  
883 Identification of MicroRNAs in Response to Cadmium Stress in Oilseed Rape (*Brassica*  
884 *napus* L.) Using High-Throughput Sequencing. *Int J Mol Sci* 19. doi: 10.3390/ijms19051431
- 885 Jian, H., Zhang, A., Ma, J., Wang, T., Yang, B., Shuang, L. S., et al. (2019). Joint QTL mapping  
886 and transcriptome sequencing analysis reveal candidate flowering time genes in *Brassica*  
887 *napus* L. *BMC Genomics* 20, 21. doi: 10.1186/s12864-018-5356-8
- 888 Jiang, H., and Köhler, C. (2012). Evolution, function, and regulation of genomic imprinting in  
889 plant seed development. *J Exp Bot* 63, 4713–4722. doi: 10.1093/jxb/ers145
- 890 Jiang, N., Bao, Z., Zhang, X., Eddy, S. R., and Wessler, S. R. (2004). Pack-MULE transposable  
891 elements mediate gene evolution in plants. *Nature* 431, 569–573. doi: 10.1038/nature02953
- 892 Johnson, N. R., Yeoh, J. M., Coruh, C., and Axtell, M. J. (2016). Improved Placement of Multi-  
893 mapping Small RNAs. *G3 (Bethesda)* 6, 2103–2111. doi: 10.1534/g3.116.030452
- 894 Kawanabe, T., Ishikura, S., Miyaji, N., Sasaki, T., Wu, L. M., Itabashi, E., et al. (2016). Role  
895 of DNA methylation in hybrid vigor in *Arabidopsis thaliana*. *Proc Natl Acad Sci U S A* 113,  
896 E6704–E6711. doi: 10.1073/pnas.1613372113
- 897 Khan, D., Ziegler, D. J., Kalichuk, J. L., Hoi, V., Huynh, N., Hajihassani, A., et al. (2022). Gene  
898 expression profiling reveals transcription factor networks and subgenome bias during  
899 *Brassica napus* seed development. *Plant J* 109, 477–489. doi: 10.1111/tpj.15587
- 900 Kim, D., Paggi, J. M., Park, C., Bennett, C., and Salzberg, S. L. (2019). Graph-based genome  
901 alignment and genotyping with HISAT2 and HISAT-genotype. *Nat Biotechnol* 37, 907–915.  
902 doi: 10.1038/s41587-019-0201-4
- 903 Kirkbride, R. C., Lu, J., Zhang, C., Mosher, R. A., Baulcombe, D. C., and Chen, Z. J. (2019).  
904 Maternal small RNAs mediate spatial-temporal regulation of gene expression, imprinting,  
905 and seed development in *Arabidopsis*. *Proc Natl Acad Sci U S A* 116, 2761–2766. doi:  
906 10.1073/pnas.1807621116
- 907 Knoch, D., Werner, C. R., Meyer, R. C., Riewe, D., Abbadi, A., Lücke, S., et al. (2021). Multi-  
908 omics-based prediction of hybrid performance in canola. *Theor Appl Genet* 134, 1147–1165.  
909 doi: 10.1007/s00122-020-03759-x
- 910 Krueger, F., and Andrews, S. R. (2011). Bismark: a flexible aligner and methylation caller for  
911 Bisulfite-Seq applications. *Bioinformatics* 27, 1571–1572. doi:  
912 10.1093/bioinformatics/btr167
- 913 Krueger, F., James, F., Ewels, P., Afyounian, E., and Schuster-Boeckler B. (2021).  
914 *FelixKrueger/TrimGalore: v0.6.7*. Zenodo. Available at:  
915 <https://doi.org/10.5281/zenodo.5127899>
- 916 Lauss, K., Wardenaar, R., Oka, R., van Hulten, M. H. A., Guryev, V., Keurentjes, J. J. B., et al.  
917 (2018). Parental DNA Methylation States Are Associated with Heterosis in Epigenetic  
918 Hybrids. *Plant Physiol* 176, 1627–1645. doi: 10.1104/pp.17.01054
- 919 Lee, H., Chawla, H. S., Obermeier, C., Dreyer, F., Abbadi, A., and Snowdon, R. (2020).  
920 Chromosome-Scale Assembly of Winter Oilseed Rape *Brassica napus*. *Front Plant Sci* 11,  
921 496. doi: 10.3389/fpls.2020.00496

- 922 Li, H. (2018). Minimap2: pairwise alignment for nucleotide sequences. *Bioinformatics* 34,  
923 3094–3100. doi: 10.1093/bioinformatics/bty191
- 924 Li, H., Handsaker, B., Wysoker, A., Fennell, T., Ruan, J., Homer, N., et al. (2009). The  
925 Sequence Alignment/Map format and SAMtools. *Bioinformatics* 25, 2078–2079. doi:  
926 10.1093/bioinformatics/btp352
- 927 Li, J., Huang, Q., Sun, M., Zhang, T., Li, H., Chen, B., et al. (2016). Global DNA methylation  
928 variations after short-term heat shock treatment in cultured microspores of *Brassica napus*  
929 cv. Topas. *Sci Rep* 6, 38401. doi: 10.1038/srep38401
- 930 Li, M., Wang, R., Wu, X., and Wang, J. (2020). Homoeolog expression bias and expression  
931 level dominance (ELD) in four tissues of natural allotetraploid *Brassica napus*. *BMC*  
932 *Genomics* 21, 330. doi: 10.1186/s12864-020-6747-1
- 933 Li, Q., Shah, N., Zhou, X., Wang, H., Yu, W., Luo, J., et al. (2021). Identification of Micro  
934 Ribonucleic Acids and Their Targets in Response to *Plasmodiophora brassicae* Infection in  
935 *Brassica napus*. *Front Plant Sci* 12, 734419. doi: 10.3389/fpls.2021.734419
- 936 Li H. (2016). *Seqtk*. <https://github.com/lh3/seqtk> (Accessed 2019)
- 937 Liao, Y., Smyth, G. K., and Shi, W. (2014). featureCounts: an efficient general purpose program  
938 for assigning sequence reads to genomic features. *Bioinformatics* 30, 923–930. doi:  
939 10.1093/bioinformatics/btt656
- 940 Liu, J., Li, J., Liu, H.-F., Fan, S.-H., Singh, S., Zhou, X.-R., et al. (2018). Genome-wide  
941 screening and analysis of imprinted genes in rapeseed (*Brassica napus* L.) endosperm. *DNA*  
942 *Res* 25, 629–640. doi: 10.1093/dnares/dsy030
- 943 Liu, J., Zhou, R., Wang, W., Wang, H., Qiu, Y., Raman, R., et al. (2020). A copia-like  
944 retrotransposon insertion in the upstream region of the SHATTERPROOF1 gene,  
945 BnSHP1.A9, is associated with quantitative variation in pod shattering resistance in oilseed  
946 rape. *J Exp Bot* 71, 5402–5413. doi: 10.1093/jxb/eraa281
- 947 Lopes, A. L. K., Kriegová, E., Lukeš, J., Krieger, M. A., and Ludwig, A. (2021). Distribution  
948 of Merlin in eukaryotes and first report of DNA transposons in kinetoplastid protists. *PLoS*  
949 *One* 16, e0251133. doi: 10.1371/journal.pone.0251133
- 950 Louwaars, N. P. (2018). Plant breeding and diversity: A troubled relationship? *Euphytica* 214,  
951 114. doi: 10.1007/s10681-018-2192-5
- 952 Love, M. I., Huber, W., and Anders, S. (2014). Moderated estimation of fold change and  
953 dispersion for RNA-seq data with DESeq2. *Genome Biol* 15, 550. doi: 10.1186/s13059-014-  
954 0550-8
- 955 Lukasik, A., Pietrykowska, H., Paczek, L., Szweykowska-Kulinska, Z., and Zielenkiewicz, P.  
956 (2013). High-throughput sequencing identification of novel and conserved miRNAs in the  
957 *Brassica oleracea* leaves. *BMC Genomics* 14, 801. doi: 10.1186/1471-2164-14-801
- 958 Lunardon, A., Johnson, N. R., Hagerott, E., Phifer, T., Polydore, S., Coruh, C., et al. (2020).  
959 Integrated annotations and analyses of small RNA-producing loci from 47 diverse plants.  
960 *Genome Res* 30, 497–513. doi: 10.1101/gr.256750.119
- 961 Mahmoud, M., Gobet, N., Cruz-Dávalos, D. I., Mounier, N., Dessimoz, C., and Sedlazeck, F.  
962 J. (2019). Structural variant calling: the long and the short of it. *Genome Biol* 20, 246. doi:  
963 10.1186/s13059-019-1828-7
- 964 Makhoul, M., Chawla, H. S., Wittkop, B., Stahl, A., Voss-Fels, K. P., Zetzsche, H., et al. (2022).  
965 Long-Amplicon Single-Molecule Sequencing Reveals Novel, Trait-Associated Variants of  
966 VERNALIZATION1 Homoeologs in Hexaploid Wheat. *Front Plant Sci* 13. doi:  
967 10.3389/fpls.2022.942461
- 968 Martinez Palacios, P., Jacquemot, M.-P., Tapie, M., Rousselet, A., Diop, M., Remoué, C., et al.  
969 (2019). Assessing the Response of Small RNA Populations to Allopolyploidy Using  
970 Resynthesized *Brassica napus* Allotetraploids. *Mol Biol Evol* 36, 709–726. doi:  
971 10.1093/molbev/msz007

- 972 Matzke, M. A., and Mosher, R. A. (2014). RNA-directed DNA methylation: an epigenetic  
973 pathway of increasing complexity. *Nat Rev Genet* 15, 394–408. doi: 10.1038/nrg3683
- 974 Meinke, D. W. (2020). Genome-wide identification of EMBRYO-DEFECTIVE (EMB) genes  
975 required for growth and development in Arabidopsis. *New Phytol* 226, 306–325. doi:  
976 10.1111/nph.16071
- 977 Meyer, R. C., Witucka-Wall, H., Becher, M., Blacha, A., Boudichevskaia, A., Dörmann, P., et  
978 al. (2012). Heterosis manifestation during early Arabidopsis seedling development is  
979 characterized by intermediate gene expression and enhanced metabolic activity in the  
980 hybrids. *Plant J* 71, 669–683. doi: 10.1111/j.1365-313X.2012.05021.x
- 981 Mhiri, C., Borges, F., and Grandbastien, M.-A. (2022). Specificities and Dynamics of  
982 Transposable Elements in Land Plants. *Biology (Basel)* 11. doi: 10.3390/biology11040488
- 983 Miller, C., Wells, R., McKenzie, N., Trick, M., Ball, J., Fatihi, A., et al. (2019). Variation in  
984 Expression of the HECT E3 Ligase UPL3 Modulates LEC2 Levels, Seed Size, and Crop  
985 Yields in Brassica napus. *Plant Cell* 31, 2370–2385. doi: 10.1105/tpc.18.00577
- 986 Montgomery, S. A., and Berger, F. (2021). The evolution of imprinting in plants: beyond the  
987 seed. *Plant Reprod* 34, 373–383. doi: 10.1007/s00497-021-00410-7
- 988 Morin, R. D., Aksay, G., Dolgosheina, E., Ebhardt, H. A., Magrini, V., Mardis, E. R., et al.  
989 (2008). Comparative analysis of the small RNA transcriptomes of Pinus contorta and Oryza  
990 sativa. *Genome Res* 18, 571–584. doi: 10.1101/gr.6897308
- 991 Muyle, A. M., Seymour, D. K., Lv, Y., Huettel, B., and Gaut, B. S. (2022). Gene Body  
992 Methylation in Plants: Mechanisms, Functions, and Important Implications for  
993 Understanding Evolutionary Processes. *Genome Biol Evol* 14. doi: 10.1093/gbe/evac038
- 994 Niederhuth, C. E., Bewick, A. J., Ji, L., Alabady, M. S., Kim, K. D., Li, Q., et al. (2016).  
995 Widespread natural variation of DNA methylation within angiosperms. *Genome Biol* 17, 194.  
996 doi: 10.1186/s13059-016-1059-0
- 997 Novák, P., Guignard, M. S., Neumann, P., Kelly, L. J., Mlinarec, J., Koblížková, A., et al.  
998 (2020). Repeat-sequence turnover shifts fundamentally in species with large genomes. *Nat*  
999 *Plants* 6, 1325–1329. doi: 10.1038/s41477-020-00785-x
- 1000 Nowak, K., Morończyk, J., Grzyb, M., Szczygieł-Sommer, A., and Gaj, M. D. (2022). miR172  
1001 Regulates WUS during Somatic Embryogenesis in Arabidopsis via AP2. *Cells* 11. doi:  
1002 10.3390/cells11040718
- 1003 O'Brien, K. P., Remm, M., and Sonnhammer, E. L. L. (2005). Inparanoid: a comprehensive  
1004 database of eukaryotic orthologs. *Nucleic Acids Res* 33, D476–80. doi: 10.1093/nar/gki107
- 1005 Orantes-Bonilla, M., Makhoul, M., Lee, H., Chawla, H. S., Vollrath, P., Langstroff, A., et al.  
1006 (2022). Frequent spontaneous structural rearrangements promote transgenerational genome  
1007 diversification in Brassica napus. *Biorxiv*. Available at:  
1008 <https://doi.org/10.1101/2022.06.27.497715>
- 1009 Pantaleo, V., Szittyá, G., Moxon, S., Miozzi, L., Moulton, V., Dalmay, T., et al. (2010).  
1010 Identification of grapevine microRNAs and their targets using high-throughput sequencing  
1011 and degradome analysis. *Plant J*, no-no. doi: 10.1111/j.1365-313X.2010.04208.x
- 1012 Pantaleo, V., Vitali, M., Boccacci, P., Miozzi, L., Cuzzo, D., Chitarra, W., et al. (2016). Novel  
1013 functional microRNAs from virus-free and infected Vitis vinifera plants under water stress.  
1014 *Sci Rep* 6, 20167. doi: 10.1038/srep20167
- 1015 Park, J.-S., Shin, Y.-H., and Park, Y.-D. (2021). DNA Methylation Level Changes in  
1016 Transgenic Chinese Cabbage (*Brassica rapa* ssp. *pekinensis*) Plants and Their Effects on  
1017 Corresponding Gene Expression Patterns. *Genes (Basel)* 12. doi: 10.3390/genes12101563
- 1018 Perumal, S., Koh, C. S., Jin, L., Buchwaldt, M., Higgins, E. E., Zheng, C., et al. (2020). A high-  
1019 contiguity Brassica nigra genome localizes active centromeres and defines the ancestral  
1020 Brassica genome. *Nat Plants* 6, 929–941. doi: 10.1038/s41477-020-0735-y



- 1021 Petryszak, R., Keays, M., Tang, Y. A., Fonseca, N. A., Barrera, E., Burdett, T., et al. (2016).  
1022 Expression Atlas update--an integrated database of gene and protein expression in humans,  
1023 animals and plants. *Nucleic Acids Res* 44, D746-52. doi: 10.1093/nar/gkv1045
- 1024 Plotnikova, A., Kellner, M. J., Schon, M. A., Mosiolek, M., and Nodine, M. D. (2019).  
1025 MicroRNA Dynamics and Functions During Arabidopsis Embryogenesis. *Plant Cell* 31,  
1026 2929–2946. doi: 10.1105/tpc.19.00395
- 1027 Quesneville, H. (2020). Twenty years of transposable element analysis in the Arabidopsis  
1028 thaliana genome. *Mob DNA* 11, 28. doi: 10.1186/s13100-020-00223-x
- 1029 Quezada-Martinez, D., Addo Nyarko, C. P., Schiessl, S. V., and Mason, A. S. (2021). Using  
1030 wild relatives and related species to build climate resilience in Brassica crops. *Theor Appl*  
1031 *Genet* 134, 1711–1728. doi: 10.1007/s00122-021-03793-3
- 1032 Quezada-Martinez, D., Zou, J., Zhang, W., Meng, J., Batley, J., and Mason, A. S. (2022). Allele  
1033 segregation analysis of F1 hybrids between independent Brassica allohexaploid lineages.  
1034 *Chromosoma*. doi: 10.1007/s00412-022-00774-3
- 1035 Quinlan, A. R., and Hall, I. M. (2010). BEDTools: a flexible suite of utilities for comparing  
1036 genomic features. *Bioinformatics* 26, 841–842. doi: 10.1093/bioinformatics/btq033
- 1037 Raizada, M. N., Benito, M.-I., and Walbot, V. (2001). The MuDR transposon terminal inverted  
1038 repeat contains a complex plant promoter directing distinct somatic and germinal programs.  
1039 *Plant J* 25, 79–91. doi: 10.1111/j.1365-313X.2001.00939.x
- 1040 Ramakrishnan, M., Satish, L., Kalendar, R., Narayanan, M., Kandasamy, S., Sharma, A., et al.  
1041 (2021). The Dynamism of Transposon Methylation for Plant Development and Stress  
1042 Adaptation. *Int J Mol Sci* 22. doi: 10.3390/ijms222111387
- 1043 Ran, L., Fang, T., Rong, H., Jiang, J., Fang, Y., and Wang, Y. (2016). Analysis of cytosine  
1044 methylation in early generations of resynthesized Brassica napus. *Journal of Integrative*  
1045 *Agriculture* 15, 1228–1238. doi: 10.1016/S2095-3119(15)61277-1
- 1046 Rauluseviciute, I., Drabløs, F., and Rye, M. B. (2020). DNA hypermethylation associated with  
1047 upregulated gene expression in prostate cancer demonstrates the diversity of epigenetic  
1048 regulation. *BMC Med Genomics* 13, 6. doi: 10.1186/s12920-020-0657-6
- 1049 Regmi, R., Newman, T. E., Kamphuis, L. G., and Derbyshire, M. C. (2021). Identification of  
1050 B. napus small RNAs responsive to infection by a necrotrophic pathogen. *BMC Plant Biol*  
1051 21, 366. doi: 10.1186/s12870-021-03148-6
- 1052 Rice, P., Longden, I., and Bleasby, A. (2000). EMBOSS: The European Molecular Biology  
1053 Open Software Suite. *Trends in Genetics* 16, 276–277. doi: 10.1016/s0168-9525(00)02024-  
1054 2
- 1055 Rong, H., Yang, W., Zhu, H., Jiang, B., Jiang, J., and Wang, Y. (2021). Genomic imprinted  
1056 genes in reciprocal hybrid endosperm of Brassica napus. *BMC Plant Biol* 21, 140. doi:  
1057 10.1186/s12870-021-02908-8
- 1058 Růžička, K., Zhang, M., Campilho, A., Bodi, Z., Kashif, M., Saleh, M., et al. (2017).  
1059 Identification of factors required for m6 A mRNA methylation in Arabidopsis reveals a role  
1060 for the conserved E3 ubiquitin ligase HAKAI. *New Phytol* 215, 157–172. doi:  
1061 10.1111/nph.14586
- 1062 Sablok, G., Srivastva, A. K., Suprasanna, P., Baev, V., and Ralph, P. J. (2015). isomiRs:  
1063 Increasing Evidences of isomiRs Complexity in Plant Stress Functional Biology. *Front Plant*  
1064 *Sci* 6, 949. doi: 10.3389/fpls.2015.00949
- 1065 Sands, B., Yun, S., and Mendenhall, A. R. (2021). Introns control stochastic allele expression  
1066 bias. *Nat Commun* 12, 6527. doi: 10.1038/s41467-021-26798-4.
- 1067 Schiessl, S., Huettel, B., Kuehn, D., Reinhardt, R., and Snowdon, R. (2017). Post-  
1068 polyploidisation morphotype diversification associates with gene copy number variation. *Sci*  
1069 *Rep* 7, 41845. doi: 10.1038/srep41845

- 1070 Schiessl, S. V., Quezada-Martinez, D., Orantes-Bonilla, M., and Snowdon, R. J. (2020).  
1071 Transcriptomics reveal high regulatory diversity of drought tolerance strategies in a biennial  
1072 oil crop. *Plant Sci* 297, 110515. doi: 10.1016/j.plantsci.2020.110515
- 1073 Scossa, F., Alseekh, S., and Fernie, A. R. (2021). Integrating multi-omics data for crop  
1074 improvement. *J Plant Physiol* 257, 153352. doi: 10.1016/j.jplph.2020.153352
- 1075 Seifert, F., Thiemann, A., Schrag, T. A., Rybka, D., Melchinger, A. E., Frisch, M., et al. (2018).  
1076 Small RNA-based prediction of hybrid performance in maize. *BMC Genomics* 19, 371. doi:  
1077 10.1186/s12864-018-4708-8
- 1078 Serin Harmanci, A., Harmanci, A. O., and Zhou, X. (2020). CaSpER identifies and visualizes  
1079 CNV events by integrative analysis of single-cell or bulk RNA-sequencing data. *Nat*  
1080 *Commun* 11, 89. doi: 10.1038/s41467-019-13779-x
- 1081 Shen, Y., Sun, S., Hua, S., Shen, E., Ye, C.-Y., Cai, D., et al. (2017). Analysis of transcriptional  
1082 and epigenetic changes in hybrid vigor of allopolyploid *Brassica napus* uncovers key roles  
1083 for small RNAs. *Plant J* 91, 874–893. doi: 10.1111/tbj.13605
- 1084 Shivaraj, S. M., Jain, A., and Singh, A. (2018). Highly preserved roles of *Brassica* MIR172 in  
1085 polyploid Brassicas: ectopic expression of variants of *Brassica* MIR172 accelerates floral  
1086 transition. *Mol Genet Genomics* 293, 1121–1138. doi: 10.1007/s00438-018-1444-3
- 1087 Sigman, M. J., and Slotkin, R. K. (2016). The First Rule of Plant Transposable Element  
1088 Silencing: Location, Location, Location. *Plant Cell* 28, 304–313. doi: 10.1105/tpc.15.00869
- 1089 Smit, A. F. A. and Hubley, R. (2008). *RepeatModeler Open-1.0*. <http://www.repeatmasker.org>  
1090 (Accessed 2018)
- 1091 Snyman, M. C., Solofoharivelo, M.-C., Souza-Richards, R., Stephan, D., Murray, S., and  
1092 Burger, J. T. (2017). The use of high-throughput small RNA sequencing reveals differentially  
1093 expressed microRNAs in response to aster yellows phytoplasma-infection in *Vitis vinifera*  
1094 cv. 'Chardonnay'. *PLoS One* 12, e0182629. doi: 10.1371/journal.pone.0182629
- 1095 Stein, A., Coriton, O., Rousseau-Guetin, M., Samans, B., Schiessl, S. V., Obermeier, C., et al.  
1096 (2017). Mapping of homoeologous chromosome exchanges influencing quantitative trait  
1097 variation in *Brassica napus*. *Plant Biotechnol J* 15, 1478–1489. doi: 10.1111/pbi.12732
- 1098 Tang, X., Bian, S., Tang, M., Lu, Q., Li, S., Liu, X., et al. (2012). MicroRNA-mediated  
1099 repression of the seed maturation program during vegetative development in *Arabidopsis*.  
1100 *PLoS Genet* 8, e1003091. doi: 10.1371/journal.pgen.1003091
- 1101 Tzafrir, I., Pena-Muralla, R., Dickerman, A., Berg, M., Rogers, R., Hutchens, S., et al. (2004).  
1102 Identification of genes required for embryo development in *Arabidopsis*. *Plant Physiol* 135,  
1103 1206–1220. doi: 10.1104/pp.104.045179
- 1104 Verma, S., Attuluri, V. P. S., and Robert, H. S. (2022). Transcriptional control of *Arabidopsis*  
1105 seed development. *Planta* 255, 90. doi: 10.1007/s00425-022-03870-x
- 1106 VIB-UGent (2021). *Venn*. <https://bioinformatics.psb.ugent.be/webtools/Venn> (Accessed 2021)
- 1107 Vitting-Seerup, K., and Sandelin, A. (2019). IsoformSwitchAnalyzeR: analysis of changes in  
1108 genome-wide patterns of alternative splicing and its functional consequences. *Bioinformatics*  
1109 35, 4469–4471. doi: 10.1093/bioinformatics/btz247
- 1110 Vollrath, P., Chawla, H. S., Schiessl, S. V., Gabur, I., Lee, H., Snowdon, R. J., et al. (2021). A  
1111 novel deletion in FLOWERING LOCUS T modulates flowering time in winter oilseed rape.  
1112 *Theor Appl Genet* 134, 1217–1231. doi: 10.1007/s00122-021-03768-4
- 1113 Wang, L., Wang, M.-B., Tu, J.-X., Helliwell, C. A., Waterhouse, P. M., Dennis, E. S., et al.  
1114 (2007). Cloning and characterization of microRNAs from *Brassica napus*. *FEBS Lett* 581,  
1115 3848–3856. doi: 10.1016/j.febslet.2007.07.010
- 1116 L. Wang, L. M. Wu, I. K. Greaves, A. Zhu, E. S. Dennis, and W. J. Peacock (2017). PIF4-  
1117 controlled auxin pathway contributes to hybrid vigor in *Arabidopsis thaliana*. *Proc Natl Acad*  
1118 *Sci U S A* 114, E3555-E3562. doi: 10.1073/pnas.1703179114
- 1119 P. Wang, C. Yang, H. Chen, C. Song, X. Zhang, and D. Wang (2017). Transcriptomic basis for  
1120 drought-resistance in *Brassica napus* L. *Sci Rep* 7, 40532. doi: 10.1038/srep40532

- 1121 Z. Wang, Y. Qiao, J. Zhang, W. Shi, and J. Zhang (2017). Genome wide identification of  
1122 microRNAs involved in fatty acid and lipid metabolism of Brassica napus by small RNA and  
1123 degradome sequencing. *Gene* 619, 61–70. doi: 10.1016/j.gene.2017.03.040
- 1124 Wang, Z., Wu, X., Wu, Z., An, H., Yi, B., Wen, J., et al. (2018). Genome-Wide DNA  
1125 Methylation Comparison between Brassica napus Genic Male Sterile Line and Restorer Line.  
1126 *Int J Mol Sci* 19. doi: 10.3390/ijms19092689
- 1127 Wei, W., Li, G., Jiang, X., Wang, Y., Ma, Z., Niu, Z., et al. (2018). Small RNA and degradome  
1128 profiling involved in seed development and oil synthesis of Brassica napus. *PLoS One* 13,  
1129 e0204998. doi: 10.1371/journal.pone.0204998
- 1130 Wei, Y., Li, G., Zhang, S., Zhang, S., Zhang, H., Sun, R., et al. (2021). Analysis of  
1131 Transcriptional Changes in Different Brassica napus Synthetic Allopolyploids. *Genes (Basel)*  
1132 12. doi: 10.3390/genes12010082
- 1133 Weigel, D., and Colot, V. (2012). Epialleles in plant evolution. *Genome Biol* 13, 249. doi:  
1134 10.1186/gb-2012-13-10-249
- 1135 Wójcik, A. M., Nodine, M. D., and Gaj, M. D. (2017). miR160 and miR166/165 Contribute to  
1136 the LEC2-Mediated Auxin Response Involved in the Somatic Embryogenesis Induction in  
1137 Arabidopsis. *Front Plant Sci* 8, 2024. doi: 10.3389/fpls.2017.02024
- 1138 Wu, J., Lin, L., Xu, M., Chen, P., Liu, D., Sun, Q., et al. (2018). Homoeolog expression bias  
1139 and expression level dominance in resynthesized allopolyploid Brassica napus. *BMC*  
1140 *Genomics* 19, 586. doi: 10.1186/s12864-018-4966-5
- 1141 Wu, J., Zhao, Q., Yang, Q., Liu, H., Li, Q., Yi, X., et al. (2016). Comparative transcriptomic  
1142 analysis uncovers the complex genetic network for resistance to Sclerotinia sclerotiorum in  
1143 Brassica napus. *Sci Rep* 6, 19007. doi: 10.1038/srep19007
- 1144 Xu, K., Wu, Y., Song, J., Hu, K., Wu, Z., Wen, J., et al. (2021). Fine Mapping and Identification  
1145 of BnaC06.FtsH1, a Lethal Gene That Regulates the PSII Repair Cycle in Brassica napus. *Int*  
1146 *J Mol Sci* 22. doi: 10.3390/ijms22042087
- 1147 Yaakov, B., and Kashkush, K. (2011). Massive alterations of the methylation patterns around  
1148 DNA transposons in the first four generations of a newly formed wheat allohexaploid.  
1149 *Genome* 54, 42–49. doi: 10.1139/G10-091
- 1150 Yang, K., Wen, X., Mudunuri, S., Varma, G. P. S., and Sablok, G. (2019). Diff isomiRs: Large-  
1151 scale detection of differential isomiRs for understanding non-coding regulated stress omics  
1152 in plants. *Sci Rep* 9, 1406. doi: 10.1038/s41598-019-38932-w
- 1153 Yang, Y., Saand, M. A., Huang, L., Abdelaal, W. B., Zhang, J., Wu, Y., et al. (2021).  
1154 Applications of Multi-Omics Technologies for Crop Improvement. *Front Plant Sci* 12,  
1155 563953. doi: 10.3389/fpls.2021.563953
- 1156 Yao, S., Liang, F., Gill, R. A., Huang, J., Cheng, X., Liu, Y., et al. (2020). A global survey of  
1157 the transcriptome of allopolyploid Brassica napus based on single-molecule long-read  
1158 isoform sequencing and Illumina-based RNA sequencing data. *Plant J* 103, 843–857. doi:  
1159 10.1111/tpj.14754
- 1160 Yi, L., Liu, B., Nixon, P. J., Yu, J., and Chen, F. (2022). Recent Advances in Understanding  
1161 the Structural and Functional Evolution of FtsH Proteases. *Front Plant Sci* 13, 837528. doi:  
1162 10.3389/fpls.2022.837528
- 1163 Yin, H., Fan, Z., Li, X., Wang, J., Liu, W., Wu, B., et al. (2016). Phylogenetic tree-informed  
1164 microRNAome analysis uncovers conserved and lineage-specific miRNAs in Camellia  
1165 during floral organ development. *J Exp Bot* 67, 2641–2653. doi: 10.1093/jxb/erw095
- 1166 Yin, L., Zhu, Z., Huang, L., Luo, X., Li, Y., Xiao, C., et al. (2021). DNA repair- and nucleotide  
1167 metabolism-related genes exhibit differential CHG methylation patterns in natural and  
1168 synthetic polyploids (Brassica napus L.). *Hortic Res* 8, 142. doi: 10.1038/s41438-021-00576-  
1169 1

- 1170 Yoo, M.-J., Szadkowski, E., and Wendel, J. F. (2013). Homoeolog expression bias and  
1171 expression level dominance in allopolyploid cotton. *Heredity (Edinb)* 110, 171–180. doi:  
1172 10.1038/hdy.2012.94
- 1173 Zanini, S. F., Bayer, P. E., Wells, R., Snowdon, R. J., Batley, J., Varshney, R. K., et al. (2022).  
1174 Pangenomics in crop improvement-from coding structural variations to finding regulatory  
1175 variants with pangenome graphs. *Plant Genome* 15, e20177. doi: 10.1002/tpg2.20177
- 1176 Zemach, A., Kim, M. Y., Silva, P., Rodrigues, J. A., Dotson, B., Brooks, M. D., et al. (2010).  
1177 Local DNA hypomethylation activates genes in rice endosperm. *Proc Natl Acad Sci U S A*  
1178 107, 18729–18734. doi: 10.1073/pnas.1009695107
- 1179 Zhang, J., Liu, Y., Xia, E.-H., Yao, Q.-Y., Liu, X.-D., and Gao, L.-Z. (2015). Autotetraploid  
1180 rice methylome analysis reveals methylation variation of transposable elements and their  
1181 effects on gene expression. *Proc Natl Acad Sci U S A* 112, E7022-9. doi:  
1182 10.1073/pnas.1515170112
- 1183 Zhang, J., Wei, L., Jiang, J., Mason, A. S., Li, H., Cui, C., et al. (2018). Genome-wide  
1184 identification, putative functionality and interactions between lncRNAs and miRNAs in  
1185 Brassica species. *Sci Rep* 8, 4960. doi: 10.1038/s41598-018-23334-1
- 1186 L. Zhang, J. He, H. He, J. Wu, and M. Li (2021). Genome-wide unbalanced expression bias and  
1187 expression level dominance toward Brassica oleracea in artificially synthesized intergeneric  
1188 hybrids of Raphanobrassica. *Hortic Res* 8, 246. doi: 10.1038/s41438-021-00672-2
- 1189 Zhang, M., Xie, S., Dong, X., Zhao, X., Zeng, B., Chen, J., et al. (2014). Genome-wide high  
1190 resolution parental-specific DNA and histone methylation maps uncover patterns of  
1191 imprinting regulation in maize. *Genome Res* 24, 167–176. doi: 10.1101/gr.155879.113
- 1192 Q. Zhang, P. Guan, L. Zhao, M. Ma, L. Xie, Y. Li, et al. (2021). Asymmetric epigenome maps  
1193 of subgenomes reveal imbalanced transcription and distinct evolutionary trends in Brassica  
1194 napus. *Mol Plant* 14, 604–619. doi: 10.1016/j.molp.2020.12.020
- 1195 Zhao, D., Hamilton, J. P., Vaillancourt, B., Zhang, W., Eizenga, G. C., Cui, Y., et al. (2018).  
1196 The unique epigenetic features of Pack-MULEs and their impact on chromosomal base  
1197 composition and expression spectrum. *Nucleic Acids Res* 46, 2380–2397. doi:  
1198 10.1093/nar/gky025
- 1199 Zhu, A., Wang, A., Zhang, Y., Dennis, E. S., Peacock, W. J., and Greaves, A. I. K. (2020).  
1200 Early Establishment of Photosynthesis and Auxin Biosynthesis Plays a Key Role in Early  
1201 Biomass Heterosis in Brassica napus (Canola) Hybrids. *Plant Cell Physiol* 61, 1134–1143.  
1202 doi: 10.1093/pcp/pcaa038
- 1203 Ziegler, D. J., Khan, D., Kalichuk, J. L., Becker, M. G., and Belmonte, M. F. (2019).  
1204 Transcriptome landscape of the early Brassica napus seed. *J Integr Plant Biol* 61, 639–650.  
1205 doi: 10.1111/jipb.12812
- 1206 Zou, J., Hu, D., Mason, A. S., Shen, X., Wang, X., Wang, N., et al. (2018). Genetic changes in  
1207 a novel breeding population of Brassica napus synthesized from hundreds of crosses between  
1208 B. rapa and B. carinata. *Plant Biotechnol J* 16, 507–519. doi: 10.1111/pbi.12791
- 1209 Zrimec, J., Börlin, C. S., Buric, F., Muhammad, A. S., Chen, R., Siewers, V., et al. (2020). Deep  
1210 learning suggests that gene expression is encoded in all parts of a co-evolving interacting  
1211 gene regulatory structure. *Nat Commun* 11, 6141. doi: 10.1038/s41467-020-19921-4



Sampling

Express 617

G3D001

F1

BBCH16

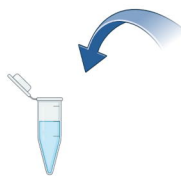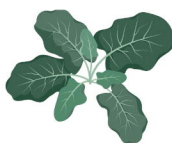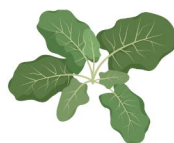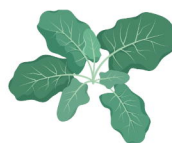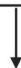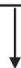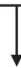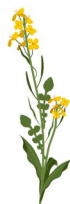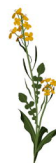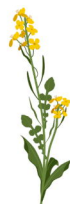

Selfing

Selfing

Selfing

Express 617

G3D001

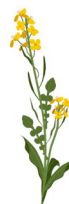

x

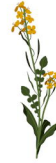

Cross-pollination

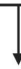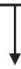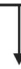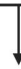

Express 617

G3D001

F1

F0

OS15

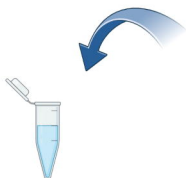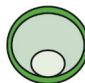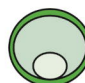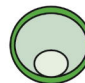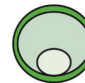

OS30

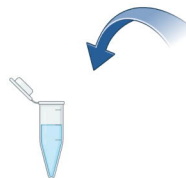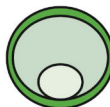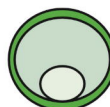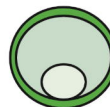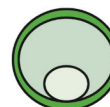



| Feature  | Stage   | Additivity                                                                        |                                                                                   | G3D001 dominance                                                                  |                                                                                   | Express 617 dominance                                                             |                                                                                   | Transgressive-down regulation/hypomethylation                                     |                                                                                    |                                                                                     | Transgressive up regulation/hypermethylation                                        |                                                                                     |                                                                                     |
|----------|---------|-----------------------------------------------------------------------------------|-----------------------------------------------------------------------------------|-----------------------------------------------------------------------------------|-----------------------------------------------------------------------------------|-----------------------------------------------------------------------------------|-----------------------------------------------------------------------------------|-----------------------------------------------------------------------------------|------------------------------------------------------------------------------------|-------------------------------------------------------------------------------------|-------------------------------------------------------------------------------------|-------------------------------------------------------------------------------------|-------------------------------------------------------------------------------------|
|          |         | I                                                                                 | XII                                                                               | II                                                                                | XI                                                                                | IV                                                                                | IX                                                                                | III                                                                               | VII                                                                                | X                                                                                   | V                                                                                   | VI                                                                                  | VIII                                                                                |
|          |         |  |  |  |  |  |  |  |  |  |  |  |  |
|          |         | E-F-G                                                                             | E-F-G                                                                             | E-F-G                                                                             | E-F-G                                                                             | E-F-G                                                                             | E-F-G                                                                             | E-F-G                                                                             | E-F-G                                                                              | E-F-G                                                                               | E-F-G                                                                               | E-F-G                                                                               | E-F-G                                                                               |
| DEG      | BBCH16  | 25.19                                                                             | 8.68                                                                              | 9.01                                                                              | 20.34                                                                             | 15.05                                                                             | 18.75                                                                             | 0.08                                                                              | 0.77                                                                               | 0.19                                                                                | 0.13                                                                                | 0.18                                                                                | 1.62                                                                                |
|          | OS15-F1 | 9.79                                                                              | 6.44                                                                              | 9.59                                                                              | 18.16                                                                             | 13.20                                                                             | 24.58                                                                             | 0.89                                                                              | 3.64                                                                               | 0.26                                                                                | 0.49                                                                                | 1.53                                                                                | 11.43                                                                               |
|          | OS15-F0 | 0.55                                                                              | 0.08                                                                              | 0.09                                                                              | 1.04                                                                              | 46.34                                                                             | 50.77                                                                             | 0.09                                                                              | 0.13                                                                               | 0.00                                                                                | 0.00                                                                                | 0.50                                                                                | 0.40                                                                                |
|          | OS30-F1 | 8.75                                                                              | 5.44                                                                              | 5.49                                                                              | 11.71                                                                             | 20.68                                                                             | 37.93                                                                             | 0.81                                                                              | 1.73                                                                               | 0.06                                                                                | 0.28                                                                                | 2.32                                                                                | 4.81                                                                                |
|          | OS30-F0 | 7.37                                                                              | 2.18                                                                              | 1.93                                                                              | 3.21                                                                              | 32.68                                                                             | 48.52                                                                             | 0.34                                                                              | 0.53                                                                               | 0.01                                                                                | 0.05                                                                                | 1.38                                                                                | 1.81                                                                                |
| DE-miRNA | BBCH16  | 13.85                                                                             | 9.23                                                                              | 9.23                                                                              | 27.69                                                                             | 9.23                                                                              | 20.00                                                                             | 0.00                                                                              | 9.23                                                                               | 0.00                                                                                | 1.54                                                                                | 0.00                                                                                | 0.00                                                                                |
|          | OS15-F1 | 5.38                                                                              | 5.38                                                                              | 8.60                                                                              | 23.66                                                                             | 18.28                                                                             | 23.66                                                                             | 0.00                                                                              | 0.00                                                                               | 0.00                                                                                | 3.23                                                                                | 0.00                                                                                | 11.83                                                                               |
|          | OS15-F0 | 1.96                                                                              | 0.00                                                                              | 0.00                                                                              | 2.94                                                                              | 42.16                                                                             | 50.00                                                                             | 0.00                                                                              | 0.00                                                                               | 0.00                                                                                | 0.00                                                                                | 1.96                                                                                | 0.98                                                                                |
|          | OS30-F1 | 14.74                                                                             | 1.99                                                                              | 2.39                                                                              | 8.37                                                                              | 23.90                                                                             | 45.02                                                                             | 0.40                                                                              | 0.40                                                                               | 0.00                                                                                | 0.00                                                                                | 0.40                                                                                | 2.39                                                                                |
|          | OS30-F0 | 14.12                                                                             | 1.15                                                                              | 0.76                                                                              | 3.44                                                                              | 33.21                                                                             | 45.04                                                                             | 0.38                                                                              | 0.38                                                                               | 0.00                                                                                | 0.00                                                                                | 0.00                                                                                | 1.53                                                                                |
| DE-siRNA | BBCH16  | 16.30                                                                             | 7.54                                                                              | 8.83                                                                              | 30.81                                                                             | 15.39                                                                             | 19.82                                                                             | 0.05                                                                              | 0.56                                                                               | 0.12                                                                                | 0.02                                                                                | 0.12                                                                                | 0.44                                                                                |
|          | OS15-F1 | 6.69                                                                              | 8.67                                                                              | 16.20                                                                             | 25.78                                                                             | 11.78                                                                             | 17.36                                                                             | 0.03                                                                              | 0.26                                                                               | 0.01                                                                                | 2.50                                                                                | 2.46                                                                                | 8.25                                                                                |
|          | OS15-F0 | 1.06                                                                              | 0.16                                                                              | 0.09                                                                              | 1.30                                                                              | 44.77                                                                             | 49.02                                                                             | 0.10                                                                              | 0.11                                                                               | 0.00                                                                                | 0.00                                                                                | 2.16                                                                                | 1.23                                                                                |
|          | OS30-F1 | 12.58                                                                             | 2.58                                                                              | 3.58                                                                              | 13.20                                                                             | 23.07                                                                             | 40.56                                                                             | 0.27                                                                              | 0.76                                                                               | 0.05                                                                                | 0.16                                                                                | 0.60                                                                                | 2.60                                                                                |
|          | OS30-F0 | 12.91                                                                             | 1.46                                                                              | 2.12                                                                              | 7.73                                                                              | 28.63                                                                             | 44.42                                                                             | 0.19                                                                              | 0.50                                                                               | 0.04                                                                                | 0.08                                                                                | 0.48                                                                                | 1.46                                                                                |
| DMR      | BBCH16  | 42.94                                                                             | 26.46                                                                             | 5.51                                                                              | 13.31                                                                             | 11.11                                                                             | 0.00                                                                              | 0.00                                                                              | 0.00                                                                               | 0.03                                                                                | 0.06                                                                                | 0.39                                                                                | 0.19                                                                                |
|          | OS15-F1 | 49.10                                                                             | 9.16                                                                              | 13.21                                                                             | 9.33                                                                              | 17.74                                                                             | 0.00                                                                              | 0.00                                                                              | 0.00                                                                               | 0.03                                                                                | 0.49                                                                                | 0.55                                                                                | 0.39                                                                                |
|          | OS15-F0 | 5.08                                                                              | 2.29                                                                              | 0.00                                                                              | 0.15                                                                              | 46.47                                                                             | 15.04                                                                             | 0.03                                                                              | 0.00                                                                               | 0.00                                                                                | 0.03                                                                                | 29.37                                                                               | 1.55                                                                                |
|          | OS30-F1 | 39.17                                                                             | 14.23                                                                             | 15.77                                                                             | 8.24                                                                              | 21.13                                                                             | 0.00                                                                              | 0.00                                                                              | 0.00                                                                               | 0.00                                                                                | 0.49                                                                                | 0.52                                                                                | 0.44                                                                                |
|          | OS30-F0 | 21.99                                                                             | 14.88                                                                             | 2.21                                                                              | 0.69                                                                              | 49.12                                                                             | 8.99                                                                              | 0.00                                                                              | 0.00                                                                               | 0.00                                                                                | 0.03                                                                                | 2.03                                                                                | 0.06                                                                                |



A

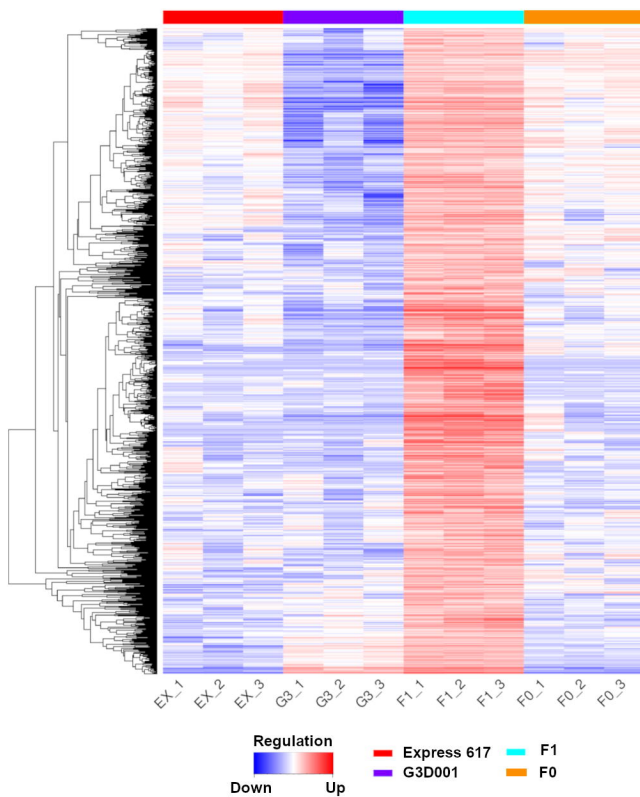

B

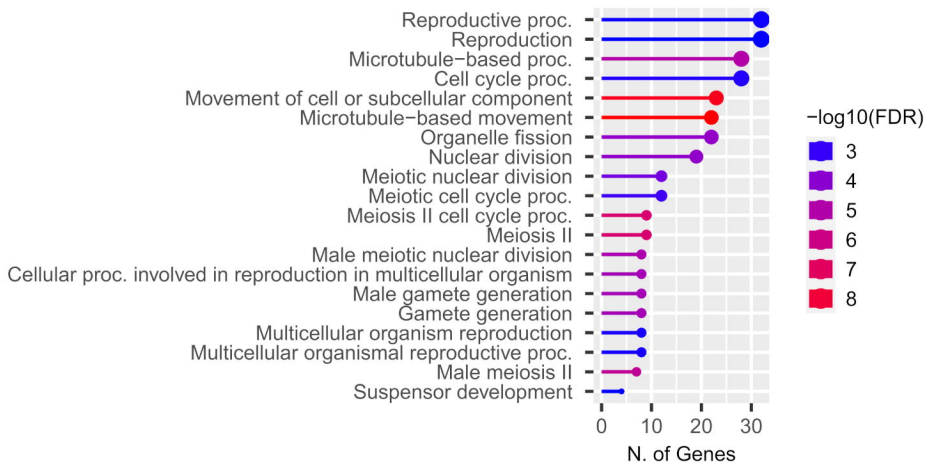

**A**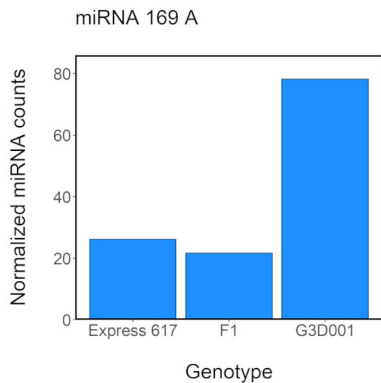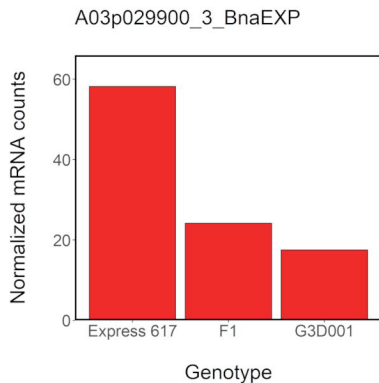**B**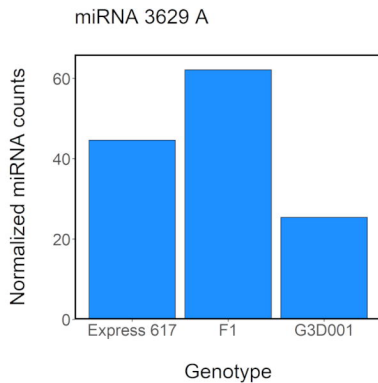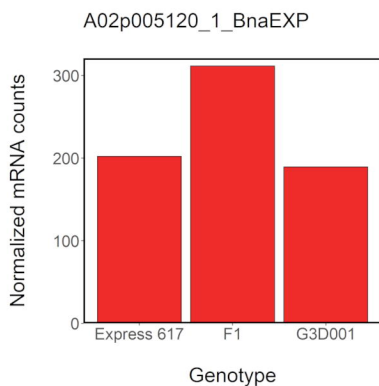

**A**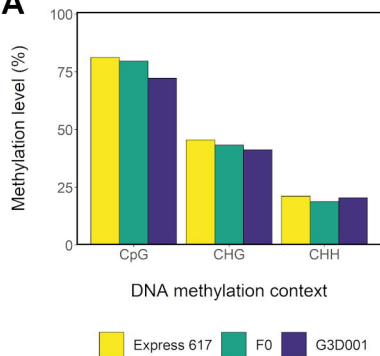**B**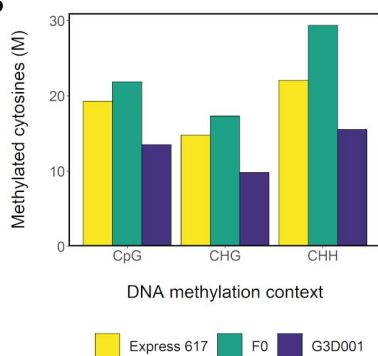**C**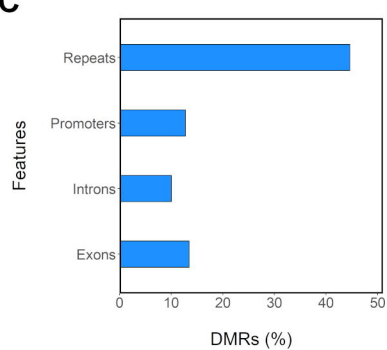**D**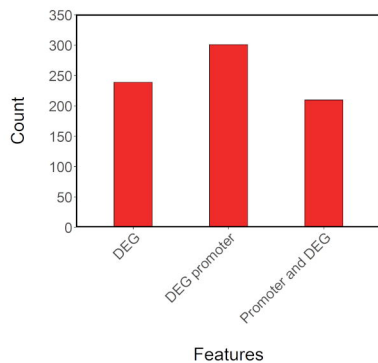**E**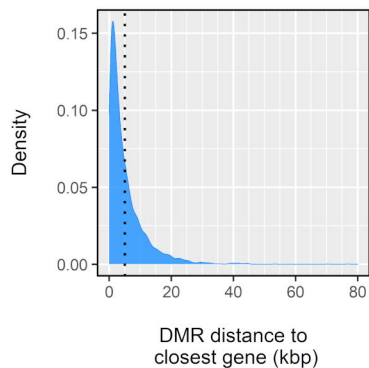



## Gene methylation

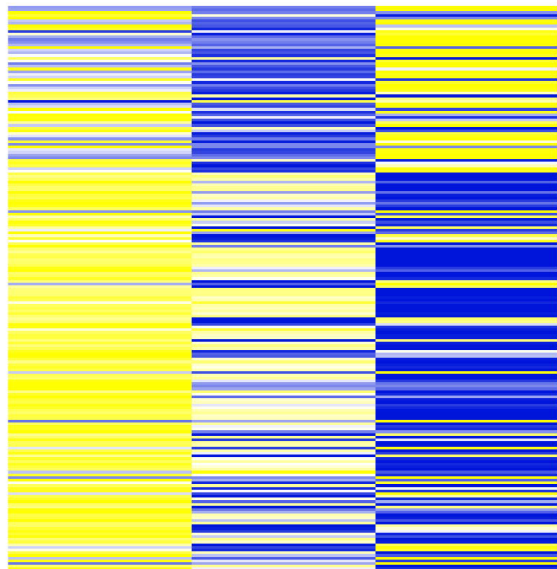

EX

F0

G3

Methylation

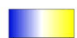

Low High

## Gene expression

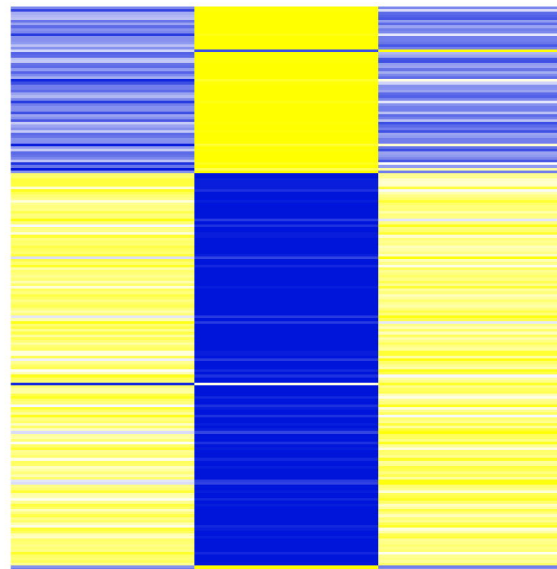

EX

F0

G3

Regulation

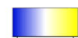

Down Up

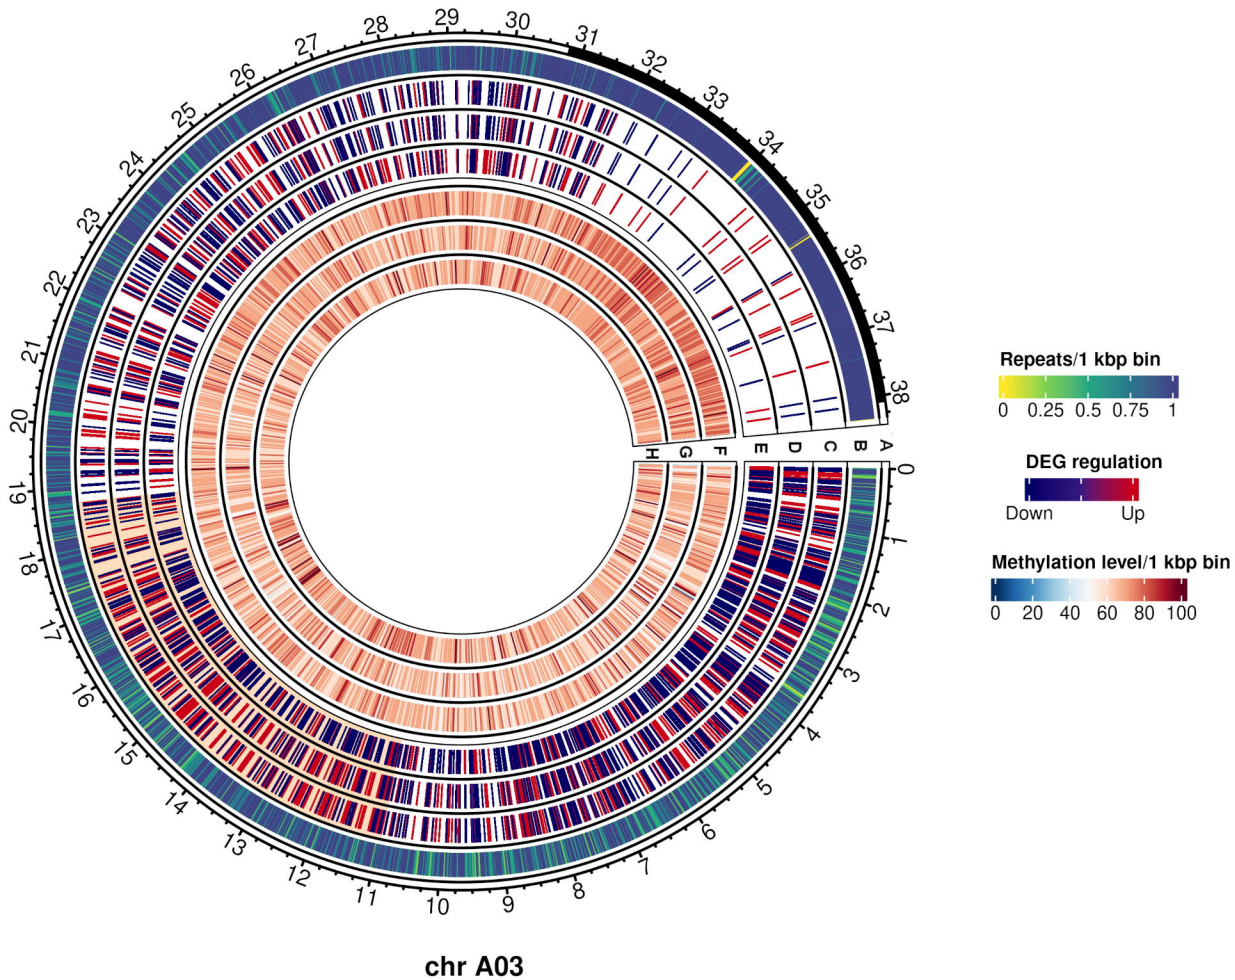

Source: https://www.biorxiv.org/content/10.1101/2022.09.05.506610v1.full.pdf
